# Supplementary material for: Acute and chronic inflammatory responses induced by smoking in individuals susceptible and non-susceptible to development of COPD: from specific disease phenotyping towards novel therapy. Protocol of a cross-sectional study
Source: PubMed Central journal article supplement — BMJ Open. 2013 Feb 1;3(2):e002178. doi: 10.1136/bmjopen-2012-002178 (PMC3586075; doi:10.1136/bmjopen-2012-002178), 2013-02-01
Supplement: bmjopen-2012-002178.draft_revisions.pdf [file bmjopen-2012-002178.draft_revisions.pdf]

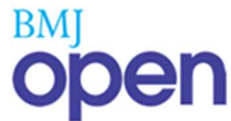

**Acute and chronic inflammatory responses induced by smoking in individuals being susceptible and non-susceptible for development of COPD: from specific disease phenotyping towards novel therapy: a cross-sectional study**

|                                 |                                                                                                                                                                                                                                                                                                                                                                                                                                                                                                                                                                                                                                                                                                                                                                                                                                                                                                                                                                                                                                                                                                                                                                                                                                                                                                                                                                                                                                                                                                                                                                                                                                                                                                                                                                                                                                                                                                                                                                                                                 |
|---------------------------------|-----------------------------------------------------------------------------------------------------------------------------------------------------------------------------------------------------------------------------------------------------------------------------------------------------------------------------------------------------------------------------------------------------------------------------------------------------------------------------------------------------------------------------------------------------------------------------------------------------------------------------------------------------------------------------------------------------------------------------------------------------------------------------------------------------------------------------------------------------------------------------------------------------------------------------------------------------------------------------------------------------------------------------------------------------------------------------------------------------------------------------------------------------------------------------------------------------------------------------------------------------------------------------------------------------------------------------------------------------------------------------------------------------------------------------------------------------------------------------------------------------------------------------------------------------------------------------------------------------------------------------------------------------------------------------------------------------------------------------------------------------------------------------------------------------------------------------------------------------------------------------------------------------------------------------------------------------------------------------------------------------------------|
| Journal:                        | <i>BMJ Open</i>                                                                                                                                                                                                                                                                                                                                                                                                                                                                                                                                                                                                                                                                                                                                                                                                                                                                                                                                                                                                                                                                                                                                                                                                                                                                                                                                                                                                                                                                                                                                                                                                                                                                                                                                                                                                                                                                                                                                                                                                 |
| Manuscript ID:                  | bmjopen-2012-002178                                                                                                                                                                                                                                                                                                                                                                                                                                                                                                                                                                                                                                                                                                                                                                                                                                                                                                                                                                                                                                                                                                                                                                                                                                                                                                                                                                                                                                                                                                                                                                                                                                                                                                                                                                                                                                                                                                                                                                                             |
| Article Type:                   | Protocol                                                                                                                                                                                                                                                                                                                                                                                                                                                                                                                                                                                                                                                                                                                                                                                                                                                                                                                                                                                                                                                                                                                                                                                                                                                                                                                                                                                                                                                                                                                                                                                                                                                                                                                                                                                                                                                                                                                                                                                                        |
| Date Submitted by the Author:   | 03-Oct-2012                                                                                                                                                                                                                                                                                                                                                                                                                                                                                                                                                                                                                                                                                                                                                                                                                                                                                                                                                                                                                                                                                                                                                                                                                                                                                                                                                                                                                                                                                                                                                                                                                                                                                                                                                                                                                                                                                                                                                                                                     |
| Complete List of Authors:       | Lo Tam Loi, Adèle; University Medical Center Utrecht, Department of Respiratory Medicine<br>Hoonhorst, Susan; University of Groningen, University Medical Center Groningen, Department of Pulmonary Disease; GRIAC research institute, University of Groningen,<br>Franciosi, Lorenza; University of Groningen, Department of Pharmacy, Analytical Biochemistry; GRIAC research institute, University of Groningen,<br>Bischoff, Rainer; University of Groningen, Department of Pharmacy, Analytical Biochemistry; GRIAC research institute, University of Groningen,<br>Hoffmann, Roland; University of Groningen, University Medical Center Groningen, Department of Pathology & Medical Biology; GRIAC research institute, University of Groningen,<br>Heijink, Irene; University of Groningen, University Medical Center Groningen, Department of Pathology & Medical Biology; GRIAC research institute, University of Groningen,<br>van Oosterhout, Antoon; University of Groningen, University Medical Center Groningen, Department of Pathology & Medical Biology; GRIAC research institute, University of Groningen,<br>Boezen, H. Marike; University of Groningen, University Medical Center Groningen, Department of Epidemiology; GRIAC research institute, University of Groningen,<br>Timens, Wim; University of Groningen, University Medical Center Groningen, Department of Pathology & Medical Biology; GRIAC research institute, University of Groningen,<br>Postma, Dirkje; University of Groningen, University Medical Center Groningen, Department of Pulmonary Disease; GRIAC research institute, University of Groningen,<br>Lammers, Jan-Willem; University Medical Center Utrecht, Department of Respiratory Medicine<br>Koenderman, Leo; University Medical Center Utrecht, Department of Respiratory Medicine<br>ten Hacken, Nick; University of Groningen, University Medical Center Groningen, Department of Pulmonary Disease; GRIAC research institute, University of Groningen, |
| <b>Primary Subject Heading</b>: | Respiratory medicine                                                                                                                                                                                                                                                                                                                                                                                                                                                                                                                                                                                                                                                                                                                                                                                                                                                                                                                                                                                                                                                                                                                                                                                                                                                                                                                                                                                                                                                                                                                                                                                                                                                                                                                                                                                                                                                                                                                                                                                            |
| Secondary Subject Heading:      | Smoking and tobacco                                                                                                                                                                                                                                                                                                                                                                                                                                                                                                                                                                                                                                                                                                                                                                                                                                                                                                                                                                                                                                                                                                                                                                                                                                                                                                                                                                                                                                                                                                                                                                                                                                                                                                                                                                                                                                                                                                                                                                                             |

1  
2  
3  
4  
5  
6  
7  
8  
9  
10  
11  
12  
13  
14  
15  
16  
17  
18  
19  
20  
21  
22  
23  
24  
25  
26  
27  
28  
29  
30  
31  
32  
33  
34  
35  
36  
37  
38  
39  
40  
41  
42  
43  
44  
45  
46  
47  
48  
49  
50  
51  
52  
53  
54  
55  
56  
57  
58  
59  
60

|           |                                                                           |
|-----------|---------------------------------------------------------------------------|
| Keywords: | COPD, Inflammation, Susceptibility, Corticosteroid insensitivity, Smoking |
|           |                                                                           |

SCHOLARONE™  
Manuscripts

For peer review only

1  
2  
3 **Acute and chronic inflammatory responses induced by smoking in individuals being**  
4 **susceptible and non-susceptible for development of COPD: from specific disease**  
5 **phenotyping towards novel therapy: a cross-sectional study**  
6  
7

8  
9 *Short title: Acute and chronic smoking effects and susceptibility to COPD*  
10

11  
12 Adèle T Lo Tam Loi<sup>1</sup>, Susan JM Hoonhorst<sup>2,6</sup>, Lorenza Franciosi<sup>3,6</sup>, Rainer Bischoff<sup>3,6</sup>, Roland  
13 F Hoffmann<sup>4,6</sup>, Irene Heijink<sup>4,6</sup>, Antoon JM van Oosterhout<sup>4,6</sup>, H. Marike Boezen<sup>5,6</sup>, Wim  
14 Timens<sup>4,6</sup>, Dirkje S Postma<sup>2,6</sup>, Jan-Willem Lammers<sup>1</sup>, Leo Koenderman<sup>1</sup>, Nick HT ten  
15 Hacken<sup>2,6</sup>  
16  
17

18  
19  
20 <sup>1</sup> *Department of Respiratory Medicine, University Medical Center Utrecht, the Netherlands*

21 <sup>2</sup> *Department of Pulmonary Disease, University of Groningen, University Medical Center*  
22 *Groningen, the Netherlands*  
23

24 <sup>3</sup> *Department of Pharmacy, Analytical Biochemistry, University of Groningen, the Netherlands*

25 <sup>4</sup> *Department of Pathology & Medical Biology, University of Groningen, University Medical*  
26 *Center Groningen, the Netherlands*  
27

28 <sup>5</sup> *Department of Epidemiology, University of Groningen, University Medical Center Groningen,*  
29 *the Netherlands*  
30

31 <sup>6</sup> *GRIAC research institute, University of Groningen, the Netherlands*  
32  
33

34  
35 **Corresponding author:**

36 Dr. N.H.T. ten Hacken  
37  
38 Dept. of Pulmonary diseases  
39  
40 University Medical Center Groningen  
41  
42 Hanzeplein 1  
43  
44 9713 GZ Groningen  
45  
46 The Netherlands  
47  
48 phone: +31-50-3614574  
49  
50 Fax: +31-50-3619320  
51  
52 n.h.t.ten.hacken@umcg.nl

53 **Keywords**

54 COPD, Inflammation, Susceptibility, Corticosteroid insensitivity, Smoking  
55

56 **Word count** 3733  
57  
58  
59  
60

**ABSTRACT***(Word count = 300)*

**Introduction:** Chronic obstructive pulmonary disease (COPD) is a heterogeneous disease with pulmonary and extra-pulmonary manifestations. Although COPD is a complex disease, the diagnosis and staging are still based on simple spirometry measurements. Different COPD phenotypes exist based on clinical, physiological, immunological, and radiological observations. Cigarette smoking is the most important risk factor for COPD, but only 15-20% of smokers develop the disease, suggesting a genetic predisposition. Unfortunately, little is known about the pathogenesis of COPD, and even less on the very first steps that are associated with an aberrant response to smoke exposure.

This study aims to investigate the underlying local and systemic inflammation of different clinical COPD phenotypes, and acute effects of cigarette smoke exposure in individuals susceptible and non-susceptible for the development of COPD. Furthermore, we will investigate mechanisms associated with corticosteroid insensitivity. Our study will provide valuable information regarding the pathogenetic mechanisms underlying the natural course of COPD.

**Methods and analysis:** This cross-sectional study will include young and old individuals susceptible or non-susceptible to develop COPD. At young age (18-40 years) 60 “party smokers” will be included that are called susceptible or non-susceptible based on COPD prevalence in smoking family members. Additionally, 30 healthy smokers (age 40-75 years) and 110 COPD patients will be included. Measurements will include questionnaires, pulmonary function, low-dose CT scanning of the lung, body composition, 6-min-walking distance, and biomarkers in peripheral blood, sputum, urine, exhaled breath condensate, epithelial lining fluid, bronchial brushes and biopsies. Non-biased approaches such as proteomics will be performed in blood and epithelial lining fluid.

**Ethics and dissemination:** This multicenter study was approved by the medical ethical committees of UMC Groningen and Utrecht, the Netherlands. The study findings will be presented at conferences and will be reported in peer-reviewed journals.

**Trial registration:** ClinicalTrials.gov, NCT00807469 (study 1) and NCT00850863 (study 2).

## ARTICLE SUMMARY

### Article focus

This article describes the study protocol of a cross-sectional study investigating the underlying local and systemic inflammation of different clinical COPD phenotypes, and acute effects of cigarette smoke exposure in individuals susceptible and non-susceptible for the development of COPD.

### Key messages

- Young (18-40) and older (40-75) individuals who are susceptible and non-susceptible to develop COPD are included.
- All groups are extensively phenotyped by clinical, physiological, immunological, and radiographical characterisation. Furthermore, effects of acute smoking are studied.

### Strengths and limitations of the study

- Extensive characterisation of a well defined study population, providing valuable information regarding the pathogenic mechanisms underlying the natural cause of COPD.
- Recruitment of a population with high and low familiar risk to develop COPD.

## BACKGROUND

Chronic obstructive pulmonary disease (COPD) is a major cause of morbidity and mortality worldwide[1]. The disease is characterized by persistent and progressive expiratory airflow obstruction (post-bronchodilator  $FEV_1/FVC < 0.70$ ) and its severity is based on  $FEV_1$  %predicted[1]. Cigarette smoking is the most important risk factor for COPD in the western world, but only 15-20 % of young smokers will eventually develop the disease, suggesting a genetic predisposition. So far, the genetic background of these susceptible smokers has not been elucidated[2]. Unravelling the underlying pathogenetic mechanisms of COPD is difficult because it takes 20-30 years of smoking before susceptible smokers develop established COPD. Also, there is the problem that COPD has many clinical expressions, and we just have started to learn how to phenotype this heterogeneous disease. Finally, there are many other risk factors that may modulate the complex interaction between the genetic background and smoking, like *in utero* events, microbial infections, dietary factors, physical inactivity and pharmacological treatment.

It is well accepted that the spirometry measurements ( $FEV_1$  and FVC) are largely insufficient to diagnose and classify COPD[1]. With the increased recognition of the various clinical expressions of COPD, consensus is growing that COPD represents a spectrum of overlapping diseases with important extra-pulmonary consequences. Phenotypes of COPD may be classified according to four domains: clinical, physiological, immunological and radiographical[3].

- Clinical distinctions are generally based on dyspnea scores, frequency of exacerbations, body mass, muscle wasting, corticosteroid responsiveness, depression / anxiety, co-morbidity, and healthy status[4].
- Physiological distinctions may be based on the degree of airflow limitation, decline in lung function, bronchodilator responsiveness, airway hyperresponsiveness, CO diffusion capacity, hyperinflation, body-plethysmography, bio-impedance, and exercise tolerance.

- Immunological features comprise the type and severity of local and systemic immunological processes in the lung and systemic compartment. In blood leukocytes cytokines, and mediators may affect the functionality of extra-pulmonary tissues and organs, leading to COPD-associated co-morbid conditions.
- Radiographic distinctions may be based on the presence of various forms and severity of emphysema, thickened large airways, and small airways abnormality on high-resolution computed tomography scans.

Although systemic inflammation and multi-organ pathology have been put forward as important features of COPD, surprisingly little is known about the underlying pathogenesis. Most COPD studies in this field included small numbers of individuals, focused on more severe stages of COPD, characterized subjects clinically on the basis of few arbitrary pulmonary measurements, did not take into account the genetic background and paid limited attention to different aspects of systemic inflammation. In addition, most studies assumed that assessment of cytokines by multiplex assays (e.g. Luminex) is sufficient to accurately describe the systemic inflammatory response. Unfortunately, many caveats are present that preclude a complete insight in this response, e.g.:

- not all cytokines implicated in COPD are known,
- little effort is taken to measure anti-inflammatory cytokines (the balance between pro- and anti-inflammatory signals will probably determine the extent and type of inflammation),
- different pro-inflammatory cytokines can act as heterologous antagonists (inhibit the effects of other cytokines).
- the kinetics of cytokines is very dynamic and no consensus is present regarding an optimal single time point for blood collection.

In the present study we set out to characterize systemic inflammation by an alternative approach. Innate immune cells will be used as integrators of pro- and anti-inflammatory

1  
2  
3 signals. We hypothesize that subtle changes in the phenotype of granulocytes and  
4  
5 monocytes are caused by an “inflammatory imprinting” of these cells.  
6  
7

8  
9 Cigarette smoking is the main risk factor for developing COPD. Repetitive acute effects of  
10  
11 cigarette smoke exposure may accumulate and after many years lead to irreversible lung  
12  
13 damage. To understand the changes in the lung due to chronic smoking we believe that it is  
14  
15 important to first investigate the exact immunological responses to an acute smoke exposure  
16  
17 event, particularly in “naive” lungs that are not yet affected by chronic smoke exposure. The  
18  
19 acute (<24 hours) effects of smoking in humans, animals and cell cultures have been  
20  
21 extensively reviewed some years ago by van der Vaart and colleagues[5]. If we integrate all  
22  
23 available data on acute smoking we are able to construct a hypothetical time frame for the  
24  
25 acute effects of smoking (figure 1). One of the very first insults on the bronchial system is by  
26  
27 oxidants present in cigarette smoke. After local depletion of anti-oxidants, the first oxidative  
28  
29 stress products can be measured within 1 hour. These products will disappear within 6  
30  
31 hours. There is a surprisingly fast influx of inflammatory cells; even faster than the synthesis  
32  
33 of some pro-inflammatory cytokines (TNF-alpha, IL-1beta, IL-8). The exact time period at  
34  
35 which the proteinase / antiproteinase balance is affected is unknown; however, protein  
36  
37 degradation is measurable within 6 hours after smoking. Unfortunately, until now, only a few  
38  
39 studies have investigated the acute effects of cigarette smoking in humans[5]. These studies  
40  
41 included only small numbers of individuals, characterized subjects mainly on basis of  
42  
43 pulmonary measurements, paid no attention to the genetic background and paid limited  
44  
45 attention to different aspects of pulmonary inflammation.  
46  
47

48  
49 Corticosteroids provide little therapeutic benefit in a relatively large group of COPD patients,  
50  
51 despite their broad anti-inflammatory effects. Our goal is to identify common markers in  
52  
53 peripheral blood monocytes, skin and lung epithelial cells that might contribute to  
54  
55 corticosteroid insensitivity. Recently, the GLUCOLD study demonstrated beneficial effects on  
56  
57 airway wall inflammation and decline in lung function yet with large inter-individual  
58  
59  
60



1  
2  
3 differences[6]. *In vitro* studies have shown that the ability of dexamethasone to suppress  
4 cytokine release (e.g. IL-8) from alveolar macrophages is impaired in COPD patients as  
5 compared to healthy smokers[7]. Furthermore, alveolar macrophages from healthy smokers  
6 are more resistant to corticosteroids than macrophages from non-smokers[8]. This relative  
7 steroid insensitivity may, in part, be explained by a suppressive effect of cigarette smoke-  
8 induced oxidative stress. This suppression may particularly play a role in the airway  
9 epithelium, where cells are in first contact with cigarette smoke and form an important source  
10 of mediators involved in the induction of neutrophilic airway inflammation (e.g. the  
11 chemoattractant IL-8). It may well be that corticosteroid insensitivity is gradually acquired by  
12 smoking in COPD, and one might hypothesize that smokers who develop COPD are more  
13 prone to have signs of corticosteroid insensitivity.  
14  
15  
16  
17  
18  
19  
20  
21  
22  
23  
24

### 25 26 27 **General hypotheses**

28  
29 There is a clear need to better understand all factors that contribute to the development of  
30 COPD and its different phenotypes. This study focuses on the pathogenesis and clinical  
31 expression of smoking-induced COPD, studied both in the pulmonary and the systemic  
32 compartments. The following general hypothesis is put forward by our consortium (figure 2):  
33  
34  
35  
36  
37  
38

39  
40 *“COPD is a multi-organ disease situated in both the lung and extra-pulmonary organs and*  
41 *tissues. Dysfunction of the latter tissues is exemplified by muscle atrophy, impaired muscle*  
42 *oxidative capacity, osteoporosis, atherosclerosis and heart failure. A low-grade systemic*  
43 *inflammation plays a pivotal role in the induction and perpetuation of this multi-organ*  
44 *disease. Smoking and persistent production of inflammatory mediators from the lung are*  
45 *inducers of systemic inflammation. Other risk factors such as diet deficiencies, sedentary life*  
46 *style, and frequent infections contribute independently to further amplification of systemic*  
47 *inflammation. In more advanced COPD the extra-pulmonary pathology starts to contribute to*  
48 *disease severity and a vicious circle of persistent difficulty to treat inflammation.*  
49 *Consequently, local and systemic inflammation should be reduced in all stages of disease by*  
50  
51  
52  
53  
54  
55  
56  
57  
58  
59  
60

1  
2  
3 reversing negative life style factors and applying successful anti-inflammatory treatment  
4 modalities. In more advanced stages multimodal interventions additionally should improve  
5 impaired tissue functions. An important contributing problem is the relative corticosteroid  
6 insensitivity of both lung and peripheral tissue responses in COPD.”  
7  
8  
9

### 10 11 12 13 **Aims of the study**

- 14  
15 • To assess systemic and local inflammation at baseline in:
  - 16  
17 a) young healthy individuals with low number of pack years smoking who have a  
18 high and low familial risk to develop COPD;
  - 19  
20 b) older individuals with higher number of pack years who either have normal lung  
21 function or COPD.  
22  
23
- 24  
25 We hypothesize that young susceptible individuals and COPD patients demonstrate a  
26 higher degree and different type of local and systemic inflammation at baseline.  
27
- 28  
29 • To study systemic and local inflammation after acute smoke exposure in the above  
30 groups. We hypothesize that young susceptible individuals and COPD patients  
31 demonstrate a higher and aberrant local and systemic inflammatory response to cigarette  
32 smoke.  
33  
34
- 35  
36 • To compare in bronchial epithelial cells and PBMCs corticosteroid responsiveness *in vitro*  
37 between susceptible and non-susceptible individuals. To study in these cells the effects  
38 of cigarette smoking and to elucidate underlying mechanisms of corticosteroid  
39 unresponsiveness.  
40  
41
- 42  
43 • To determine whether the type and severity of the systemic inflammatory response contributes  
44 to the clinical outcome of COPD. We hypothesize that the type and severity of systemic  
45 inflammation have profound effects on the clinical picture of COPD.  
46  
47
- 48  
49 • To investigate the relationship between downstream genetic effects (transcriptome, proteome)  
50 and specific COPD phenotypes in peripheral blood and lung tissue (induced sputum, bronchial  
51 biopsies, epithelial lining fluid).  
52  
53  
54  
55  
56  
57  
58  
59  
60

## METHODS

### Study population

In total 200 old and young individuals who are susceptible or not susceptible to develop COPD will be recruited (table 1). At old age (>40 years), 30 healthy smokers (>20 pack years) and 110 COPD patients (>10 pack years) will be enrolled in the study. At young age, 60 “party smokers” with a normal lung function will be included with a high or low prevalence of COPD in smoking family members (see table 1). Party smoking was defined by irregularly smoking and/or able to quit smoking for at least two days. Exclusion criteria are:  $\alpha$ -1-antitrypsin-deficiency, acute pulmonary infections (like tuberculosis, pneumonia, flue, tracheobronchitis), prior history of significant inflammatory lung disease other than COPD (sarcoidosis, pulmonary fibrosis, silicosis, ect.), active infections (such as hepatitis A-C, cystitis, gastro-enteritis etc.), treatment with antibiotics or corticosteroids within 8 weeks, taking part in another study, recent diagnosis of cancer. Medication such as NSAIDs and immunosuppressive agents which could affect the results of the study will be excluded, as well as substance abuse. Co-morbidities that might lead to study-related (serious) adverse events will be excluded on basis of an arbitrary selection of conditions listed in the ACE-27 co-morbidity scale[9].

**Table 1 Study population**

| Disease                | No | Age (Yrs) | Smoking status | Pack years | FEV <sub>1</sub> /VC, % | FEV <sub>1</sub> , % pred |
|------------------------|----|-----------|----------------|------------|-------------------------|---------------------------|
| <i>Non-susceptible</i> |    |           |                |            |                         |                           |
| Healthy [A]            | 30 | 18-40     | Party smoking  | 0-10       | > 70                    | > 85                      |
| Healthy [B]            | 30 | 40-75     | Ex or current  | >20        | > 70                    | > 85                      |
| <i>Susceptible</i>     |    |           |                |            |                         |                           |
| Healthy [C]            | 30 | 18-40     | Party smoking  | 0-10       | > 70                    | > 85                      |
| COPD                   |    |           |                |            |                         |                           |
| Stage I [D1]           | 30 | 40-75     | Ex or current  | >10        | ≤ 70                    | > 80                      |
| Stage II [D2]          | 30 | 40-75     |                | >10        | ≤ 70                    | 50-80                     |
| Stage III [D3]         | 30 | 40-75     |                | >10        | ≤ 70                    | 30-50                     |
| Stage IV [D4]*         | 20 | 40-75     |                | >10        | ≤ 70                    | < 30                      |
|                        |    | < 53      |                |            |                         | < 30%                     |

*Susceptibility in young individuals is based on family history. Not susceptible means that none of the smoking family members who are at least 40 years of age have COPD. Susceptible means that the prevalence of COPD in smoking family members older than 40 years is high: 2 out of 2, 2 out of 3 or 3 out of 3, 3 out of 4 or 4 out of 4. Party smoking was defined by irregularly smoking and/or able to quit smoking for at least two days. Alpha-1-antitrypsin deficiency is excluded. \*patients with a FEV<sub>1</sub> 30-50% predicted in combination with chronic respiratory failure also have stage IV.*

### **Study design**

This study is a bi-center cross-sectional study that takes place at the University Medical Centers Utrecht (UMC Utrecht) and Groningen (UMC Groningen). Participating subjects will undergo extensive clinical characterisation (table 2). Local and systemic inflammation will be investigated in several ways. Special attention will be paid to acute smoking and corticosteroid insensitivity in selected subgroups.

Table 2 Measurements

|                       | Measurements                                 | Group      |
|-----------------------|----------------------------------------------|------------|
| <b>Clinical</b>       | Demographics                                 | All        |
|                       | Physical examination                         | All        |
|                       | Peripheral blood (routine measurements)      | All        |
|                       | Presence of metabolic syndrome               | All        |
|                       | ECG                                          | B, D1-4    |
|                       | Bode index                                   | B, D1-4    |
|                       | Fagerstrom Smoking Questionnaire             | All        |
|                       | St Georges Respiratory Questionnaire (SGRQ)  | D1-4       |
|                       | Clinical COPD Questionnaire (CCQ)            | D1-4       |
|                       | SQUASH                                       | All        |
|                       | Urine (microproteins)                        | All        |
|                       | AGE (Advanced Glycation Endproducts)-reader  | All        |
|                       | Skin blanching test                          | All        |
| <b>Physiological</b>  | Flow volume + reversibility                  | All        |
|                       | Body plethysmography                         | All        |
|                       | CO diffusion                                 | All        |
|                       | Methacholine challenge test                  | A,B,C,D1-3 |
|                       | Bioelectrical impedance                      | All        |
|                       | Six minute walking distance                  | B,D1-4     |
| <b>Immunological</b>  | Sputum induction (only baseline)             | A,B,C,D2   |
|                       | Peripheral blood (systemic inflammation)     | All        |
|                       | Peripheral blood 4x (acute smoking)          | A,B,C,D2   |
|                       | Exhaled breath condensate 3x (acute smoking) | A,B,C,D2   |
|                       | Exhaled CO 5x (acute smoking)                | A,B,C,D2   |
|                       | Bronchial biopsy 2x (acute smoking)          | A,B,C,D2   |
|                       | Epithelial lining fluid 2x (acute smoking)   | A,B,C,D2   |
|                       | Epithelial brushes 2x (acute smoking)        | A,B,C,D2   |
| <b>Radiographical</b> | Low dose HRCT-scan lung                      | All        |

### Clinical outcomes

Demographic variables include: age, sex, smoking habits, education, profession, other exposures, height and weight. Risk factors of the metabolic syndrome will be determined including blood pressure, waist hip circumference, lipid profile and fasting glucose (table 2). Questionnaires will be the Clinical COPD Questionnaire (CCQ), the St Georges Respiratory Questionnaire (SGRQ), the Dutch Fagerstrom test for nicotine dependence, and the Short QUestionnaire to ASsess Health-enhancing physical activity (SQUASH)[10-12]. Exacerbation frequency will be recorded in COPD patients. The BODE-index will be calculated on basis of FEV<sub>1</sub>, six-minute-walking distance, Body Mass Index (BMI) and MRC-dyspnea score[4]. In urine (micro) protein concentration will be assessed. Corticosteroid sensitivity will be measured by the cutaneous vasoconstrictor response to topical budesonide using the skin blanching test[13]. Budesonide dissolved in 95% ethanol will be applied to the skin using eight different concentrations (0-1000 µg/ml). Blanching will be scored with a 7-point scale: 0-3 (increasing with steps of 0.5; 0 = no blanching and 3 = intense blanching). Cumulative oxidative stress will be measured in the skin using the non-invasive AGE (Advanced Glycation Endproducts) reader (DiagnOptics, Groningen, The Netherlands)[14].

### Physiological outcomes

Spirometry will be performed according to international guidelines (ERS 2005)[15]. We will assess FEV<sub>1</sub>, FEV<sub>1</sub>/FVC, IVC, FEF50, FEF75, reversibility to salbutamol, TLC, FRC (body box), and CO diffusion. Methacholine challenge tests are performed according to international guidelines (ERS 2005), using serial doubling concentrations of methacholine-bromide (0.03 to 38.4 mg/ml) with the 2-min tidal breathing method at 5-minute intervals. The six-minute-walking-distance (6MWD) will be determined according the American Thoracic Society published guidelines of 2002[16]. Individuals should walk at their own pace, can stop if necessary, and are allowed to use oxygen. Body composition will be estimated using single frequency (50 kHz) bioelectrical impedance (Biostat 500), and fat-free-mass will be calculated with the disease-specific equation of Schols et al[17].

## Immunological outcomes

### *Lung inflammation*

- Sputum will be induced and processed according to a validated and standardized technique[18], with some modifications. Differential cell counts of eosinophils, neutrophils, lymphocytes, macrophages, epithelial and squamous cells will be performed on May Grünwald Giemsa (MGG) stained cytopins by a qualified cytopathologist.
- Exhaled breath condensate (EBC) will be collected using The EcoScreen® (Jaeger, Hoechberg, Germany). Hydrogen peroxide, pH, 8-isoprostane, nitrite, nitrate, 4-hydroxy-2-nonenal and malondialdehyde will be measured.
- Bronchoscopy will be performed using established guidelines[19-21], and 6 bronchial biopsies will be taken from subsegmental carinae in the right or left lower lobe. Epithelial morphology, epithelial proliferation, and basement membrane thickness will be measured[22]. Submucosal density of inflammatory cells (AA1, EG2, CD68, CD3, CD4, CD4CD25, CD8, mast cells, neutrophils) will be quantitated in a semi-automated way[22]. Expression of E-Cadherin, VEGF, ICAM, VCAM, E-selection, P-selectin, AGEs and RAGEs will be measured.
- Epithelial lining fluid will be sampled by advancing 3 microsample probes (BC -401C, Olympus, Tokyo, Japan) in the lumen of the left main bronchus[23,24]. Cytokines will be measured by Luminex (Linco, Nuclilab BV, Ede, The Netherlands). 90% of the ELF will be used for proteomic analysis. Briefly, each trypsin digested sample will be labeled (iTRAQ® Reagent 8-plex, ABSciex, Foster City, CA, USA) according to the manufacturer's protocol. The individually labeled digests will be combined into a single sample mixture and subjected to strong-cation exchange chromatography (AKTA Purifier, GE Healthcare Biosciences AB, Uppsala, Sweden). The resulting peptide-containing fractions will be separated by reversed-phase chromatography (Ultimate 3000 nanoflow liquid chromatography system, Dionex, Amsterdam, The Netherlands). Fractions of 12 sec will be spotted on MALDI targets (Probot, Dionex, Amsterdam, The Netherlands) and mass spectrometric analysis will be carried out on a 4800 Proteomics Analyzer MALDI

1  
2  
3 TOF/TOF instrument (Applied Biosystems, Foster City, CA, USA) controlled by the 4000  
4 Series Explorer v3.5 software. Proteins will be identified using Protein Pilot® software  
5 v2.0 (Applied Biosystems).  
6  
7

- 8  
9 • Bronchial epithelial cells will be harvested from the right or left main bronchus by  
10 brushing as described elsewhere[25]. Brushed epithelial cell will be cultured to enable  
11 corticosteroid sensitivity experiments.  
12  
13

### 14 15 16 17 *Systemic inflammation*

18 Systemic inflammation will be measured in peripheral blood using several methods to study  
19 systemic activation of innate immune cells at three different levels:  
20  
21

- 22  
23 • Expression of established and newly markers on innate immune cells associated with  
24 pre-activation[26,27]  
25  
26  
27 • Determination of the sensitivity of innate immune cells for stimuli  
28  
29  
30 • Genomic and proteomic analysis of innate immune cells in vivo[28]  
31  
32 • Multiplex analysis of the presence of pro-and anti-inflammatory cytokines in  
33 plasma/serum.  
34

35 Systemic inflammation will also be measured in peripheral blood using peripheral blood  
36 mononuclear cells (PBMC's):  
37  
38

- 39  
40 • Expression of intracellular and cell-surface markers of adaptive immune cells (Th1-cells,  
41 Th2-cells, Th17-cells, T<sub>reg</sub>-cells, B-cells, NK-cells)  
42  
43  
44

### 45 46 *Lung and systemic inflammation after acute smoking*

47 Young and old subjects who are susceptible or not susceptible to develop COPD will smoke 3  
48 cigarettes in 1 hour. Blood samples, urine, exhaled breath condensate, bronchial biopsies, epithelial  
49 lining fluid and epithelial brushes will be collected at baseline and after smoking according the  
50 scheme in table 3. Exhaled CO will be measured at baseline to check if individuals did not smoke  
51 recently, and after smoking to check if individuals inhaled cigarette smoke sufficiently.  
52  
53  
54  
55  
56  
57  
58  
59  
60



Sputum supernatant, epithelial cells, serum, plasma, DNA, and RNA of blood will be stored for further analyses.

**Table 3 Acute smoke model**

|                           | Baseline | Smoking<br>3 cigarettes | 5<br>minutes | 2<br>hours | 24<br>hours | 6<br>weeks |
|---------------------------|----------|-------------------------|--------------|------------|-------------|------------|
| Exhaled CO                | x        |                         | x            | x          | x           | x          |
| Blood                     | x        |                         |              | x          |             |            |
| Exhaled breath condensate | x        |                         | x            | x          |             |            |
| Urine                     | x        |                         |              | x          | x           |            |
| Bronchial Biopsies        |          |                         |              |            | x           | x          |
| Epithelial brush          |          |                         |              |            | x           | x          |
| Microsampling probe (ELF) |          |                         |              |            | x           | x          |

### Radiological outcomes

All subjects will undergo a low-dose CT-scan at full inspiration and expiration. Exposure settings will be 30 mAs at 90 kVp for patients weighing less than 50 kg, 30 mAs at 120 kVp for patients weighing between 50 and 80 kg and 30 mAs at 140 kVp for those weighing more than 80 kg without dose modulation. During expiration the exposure settings will be 20 mAs at 90 kVp (body mass < 80kg) or 20 mAs at 120 kVp (body mass > 80kg). Emphysematous lung changes will be quantitated using automated software on low-dose CT scanning images developed in the UMC Utrecht.

### Ethics and dissemination

The two studies are registered at [clinicaltrials.gov](http://clinicaltrials.gov) (identifier study 1: NCT00807469 and identifier study 2: NCT 00850863). These two studies have been judged by the medical ethical committee of UMC Groningen and additionally study 2 has been minimally judged by

1  
2  
3  
4  
5  
6  
7  
8  
9  
10  
11  
12  
13  
14  
15  
16  
17  
18  
19  
20  
21  
22  
23  
24  
25  
26  
27  
28  
29  
30  
31  
32  
33  
34  
35  
36  
37  
38  
39  
40  
41  
42  
43  
44  
45  
46  
47  
48  
49  
50  
51  
52  
53  
54  
55  
56  
57  
58  
59  
60

the medical ethical committee of UMC Utrecht. The study findings will be presented at conferences and will be reported in peer-reviewed journals.

For peer review only

## DISCUSSION

There is a large backlog in the recognition of different phenotypes of COPD and their underlying immunopathological processes. This importantly hinders the appropriate diagnosis, treatment and prognosis of this debilitating disease. Currently lung function (FEV<sub>1</sub> and FEV<sub>1</sub>/FVC) is still the standard for the diagnosis and classification of COPD[1]. However, there is general consensus that FEV<sub>1</sub> poorly correlates with important patient-centred outcomes such as quality of life, symptoms and exercise capacity[29]. Celli et al showed an association between FEV<sub>1</sub> and mortality when FEV<sub>1</sub> was combined with MRC-dyspnoea score, 6-minute walking distance and BMI. The so-called BODE index was put forward as a composite measure to characterise COPD in a more realistic way[4]. In the last decades different approaches have been put forward to characterize COPD leading to at least 16 different phenotypes[30]. Although clinically relevant in terms of presentation, triggers and treatment response these phenotypes do not necessarily give insight into the underlying disease processes of COPD. In this perspective the term intermediate phenotype or endotype has been put forward to describe a subtype of a disease which is defined by a distinct functional or pathophysiological mechanism[31]. Together with genetic and environmental factors intermediate phenotypes may explain the clinical presentation of a heterogeneous disease like COPD. Accordingly, the present study will phenotype the induction and progression of COPD and associate this with underlying pathophysiological mechanisms in a biased as well as non-biased way. As smoking is the most important environmental risk factor for COPD we will use an acute smoking model to evaluate differences in smoking-induced acute mechanisms differentially expressed between individuals with a high and low risk for development of COPD.

Recently, a large prospective cohort study (ECLIPSE) was initiated to study the natural course of COPD in order to gain more insight in the underlying pathogenetic mechanisms[32]. The ECLIPSE study is a three year observational study including current and ex-smoking COPD patients and healthy controls with and without a smoking history.

1  
2  
3 Indeed the ECLIPSE study confirmed that the clinical manifestations of COPD are highly  
4 variable and that the degree of airflow limitation does not capture the heterogeneity of the  
5 disease[33]. Particularly, the rate of change in FEV<sub>1</sub> among patients with COPD was highly  
6 variable, with increased rates of decline among current smokers, patients with bronchodilator  
7 reversibility and with emphysema[34]. Several new susceptibility genes have been identified  
8 in the ECLIPSE study[35,36], as well as potentially useful biomarkers[37-39]. However, in  
9 contrast to our study ECLIPSE does not include young subjects and is, therefore, not able to  
10 investigate the susceptibility for COPD at young age. ECLIPSE investigates aspects of  
11 systemic inflammation (CRP, TNF- $\alpha$ , IL-6, IL-8, SDP), but does not investigate the activation  
12 state of circulating neutrophils and lymphocytes, nor does it perform unbiased proteomic  
13 analyses of epithelial lining fluid and peripheral blood neutrophils. Therefore, our study will  
14 complement ECLIPSE data by focusing on the pathogenesis of local and systemic  
15 inflammation by using unique approaches to link genomic and inflammatory phenotypes in all  
16 stages of COPD from preclinical to advanced disease.  
17  
18  
19  
20  
21  
22  
23  
24  
25  
26  
27  
28  
29  
30  
31

32 The present study has already been started and recruitment is still ongoing. The study  
33 population has been described in ClinicalTrial.gov (NCT00807469, NCT 00850863) and was  
34 divided into 9 groups. Initially, we planned to distinguish susceptible individuals into a  
35 “susceptible” and “very susceptible” group. The group of “old” very susceptible individuals  
36 should include early-onset COPD (FEV<sub>1</sub>/FVC<70%, FEV<sub>1</sub>< 40% predicted, age<53 years)  
37 and COPD with low number of pack years (FEV<sub>1</sub>/FVC < 70%, FEV<sub>1</sub> < 80%predicted, pack  
38 years<5). The group of “young” very susceptible individuals should have included young  
39 individuals with family members with early-onset COPD or COPD with low smoke exposure.  
40 Despite an intensive search among lung transplantation (LTx) candidates/recipients and their  
41 family members we were not able to recruit this group in sufficiently high numbers.  
42 Therefore, we decided to combine the susceptible and very susceptible groups.  
43  
44  
45  
46  
47  
48  
49  
50  
51  
52  
53  
54  
55  
56  
57  
58  
59  
60

1  
2  
3 COPD is often accompanied by different co-morbidities, especially cardiovascular conditions,  
4  
5 which also affect the prognosis of the disease as well as quality of life and cost of  
6  
7 COPD[40,41]. Consequently, we do not exclude subjects with cardiovascular co-morbidity  
8  
9 conditions unless the condition was acute or too severe. We use the selected grade 1-3 co-  
10  
11 morbidity list in the ACE-27[9] to exclude patients with co-morbidities within grade 2 or 3 in all  
12  
13 organ systems except the respiratory system. We also exclude subjects with systemic  
14  
15 inflammatory diseases such as rheumatoid arthritis, because we might investigate systemic  
16  
17 inflammation related to other systemic inflammatory diseases.  
18  
19

20  
21 In conclusion this study will provide valuable information regarding the pathogenetic  
22  
23 mechanisms underlying the development of COPD, which in the future will help us to develop  
24  
25 new targets for the management of different phenotypes of COPD.  
26  
27  
28  
29  
30  
31  
32  
33  
34  
35  
36  
37  
38  
39  
40  
41  
42  
43  
44  
45  
46  
47  
48  
49  
50  
51  
52  
53  
54  
55  
56  
57  
58  
59  
60

## Funding

This research was done in the framework of the Top Institute Pharma project T1-108 "Acute and chronic inflammatory responses-COPD and smoking", with partners University Medical Center Groningen (UMCG), University of Groningen (RUG), GRIAC research institute Groningen, University Medical Center Utrecht (UMCU), Nycomed BV, GlaxoSmithKline, and Foundation TI Pharma. The corticosteroid sensitivity part of study 1 was also done in the framework of the Top Institute Pharma project T1-201 "COPD, transition of systemic inflammation into multiorgan pathology", with partners University Medical Center Groningen, University Medical Center Utrecht, University Medical Center Maastricht, Nycomed BV, GlaxoSmithKline, Danone, AstraZeneca, and Foundation TI Pharma.

## Competing Interests

AT, SH, LF, RB, RH, IH, AO, MB, JW, and LK have no competing interests to declare. WT has received payment for lectures from Chiesi, GSK, and Roche diagnostics. DP has received an unrestricted educational grant for research from AstraZeneca and Chiesi; fees for consultancies by DP were given to the University of Groningen by AZ, Boehringer Ingelheim, Chiesi, GSK, Nycomed and TEVA; NH received grants from GlaxoSmithKline, Boehringer Ingelheim, Nycomed and Chiesi.

## Authors' contributions

NH, JW, DSP, LK, RB, AO, WT, and MB participated in the design and supervision of the study. ALT and SH were involved in the patient-related investigations and contributed equally to the manuscript. LF performed the proteomic analyses of epithelial lining fluid. RH investigated in vitro corticosteroid sensitivity of epithelial cells. All authors read and approved the final manuscript.

1  
2  
3 **REFERENCES**  
4  
5

6 1 Global initiative for Chronic Obstructive Lung Disease. Global strategy for the diagnosis,  
7 management, and prevention of chronic obstructive pulmonary disease. 2010; Available at:

8 [http://www.goldcopd.org/uploads/users/files/GOLDReport\\_April112011.pdf](http://www.goldcopd.org/uploads/users/files/GOLDReport_April112011.pdf).  
9

10  
11  
12  
13 2 Joos L, Pare PD, Sandford AJ. Genetic risk factors of chronic obstructive pulmonary  
14 disease. *Swiss Med Wkly*. 2002;**132** (suppl 3-4):27-37.  
15

16  
17  
18 3 Friedlander AL, Lynch D, Dyar LA, *et al*. Phenotypes of chronic obstructive pulmonary  
19 disease. *COPD*. 2007;**4** (suppl 4):355-384.  
20

21  
22  
23 4 Celli BR, Cote CG, Marin JM, *et al*. The body-mass index, airflow obstruction, dyspnea,  
24 and exercise capacity index in chronic obstructive pulmonary disease. *N Engl J Med*.  
25  
26 2004;**350** (suppl 10):1005-1012.  
27

28  
29  
30 5 van der Vaart H, Postma DS, Timens W, *et al*. Acute effects of cigarette smoke on  
31 inflammation and oxidative stress: a review. *Thorax*. 2004;**59** (suppl 8):713-721.  
32

33  
34  
35 6 Lapperre TS, Snoeck-Stroband JB, Gosman MM, *et al*. Effect of fluticasone with and  
36 without salmeterol on pulmonary outcomes in chronic obstructive pulmonary disease: a  
37 randomized trial. *Ann Intern Med*. 2009;**151** (suppl 8):517-527.  
38

39  
40  
41 7 Culpitt SV, Rogers DF, Shah P, *et al*. Impaired inhibition by dexamethasone of cytokine  
42 release by alveolar macrophages from patients with chronic obstructive pulmonary disease.  
43  
44 *Am J Respir Crit Care Med*. 2003;**167** (suppl 1):24-31.  
45

46  
47  
48 8 Russell RE, Culpitt SV, DeMatos C, *et al*. Release and activity of matrix metalloproteinase-  
49  
50 9 and tissue inhibitor of metalloproteinase-1 by alveolar macrophages from patients with  
51 chronic obstructive pulmonary disease. *Am J Respir Cell Mol Biol*. 2002;**26** (suppl 5):602-  
52  
53 609.  
54  
55  
56  
57  
58  
59  
60

- 1  
2  
3 9 Paleri V, Wight RG. Applicability of the adult comorbidity evaluation - 27 and the Charlson  
4 indexes to assess comorbidity by notes extraction in a cohort of United Kingdom patients  
5 with head and neck cancer: a retrospective study. *J Laryngol Otol.* 2002;**116** (suppl 3):200-  
6 205.  
7  
8  
9  
10  
11 10 Vink JM, Willemsen G, Beem AL, *et al.* The Fagerstrom Test for Nicotine Dependence in  
12 a Dutch sample of daily smokers and ex-smokers. *Addict Behav.* 2005;**30** (suppl 3):575-579.  
13  
14  
15  
16  
17 11 Wendel-Vos GC, Schuit AJ, Saris WH, *et al.* Reproducibility and relative validity of the  
18 short questionnaire to assess health-enhancing physical activity. *J Clin Epidemiol.* 2003;**56**  
19 (suppl 12):1163-1169.  
20  
21  
22  
23  
24 12 Jones PW, Quirk FH, Baveystock CM. The St George's Respiratory Questionnaire. *Respir*  
25 *Med.* 1991;**85 Suppl B**:25-31; discussion 33-7.  
26  
27  
28  
29  
30 13 Livingston E, Chaudhuri R, McMahon AD, *et al.* Systemic sensitivity to corticosteroids in  
31 smokers with asthma. *Eur Respir J.* 2007;**29** (suppl 1):64-71.  
32  
33  
34  
35 14 Meerwaldt R, Graaff R, Oomen PH, *et al.* Simple non-invasive assessment of advanced  
36 glycation endproduct accumulation. *Diabetologia.* 2004;**47** (suppl 7):1324-1330.  
37  
38  
39  
40 15 Miller MR, Hankinson J, Brusasco V, *et al.* Standardisation of spirometry. *Eur Respir J.*  
41 2005;**26** (suppl 2):319-338.  
42  
43  
44  
45 16 ATS Committee on Proficiency Standards for Clinical Pulmonary Function Laboratories.  
46 ATS statement: guidelines for the six-minute walk test. *Am J Respir Crit Care Med.* 2002;**166**  
47 (suppl 1):111-117.  
48  
49  
50  
51  
52 17 Baarends EM, van Marken Lichtenbelt WD, Wouters EF, *et al.* Body-water compartments  
53 measured by bio-electrical impedance spectroscopy in patients with chronic obstructive  
54 pulmonary disease. *Clin Nutr.* 1998;**17** (suppl 1):15-22.  
55  
56  
57  
58  
59  
60



1  
2  
3 18 Snoeck-Stroband JB, Lapperre TS, Gosman MM, *et al.* Chronic bronchitis sub-phenotype  
4 within COPD: inflammation in sputum and biopsies. *Eur Respir J.* 2008;**31** (suppl 1):70-77.  
5  
6

7  
8 19 Workshop summary and guidelines: investigative use of bronchoscopy, lavage, and  
9 bronchial biopsies in asthma and other airway diseases. *J Allergy Clin Immunol.* 1991;**88**  
10 (suppl 5):808-814.  
11  
12

13  
14  
15 20 Hattotuwa K, Gamble EA, O'Shaughnessy T, *et al.* Safety of bronchoscopy, biopsy, and  
16 BAL in research patients with COPD. *Chest.* 2002;**122** (suppl 6):1909-1912.  
17  
18

19  
20 21 British Thoracic Society Bronchoscopy Guidelines Committee, a Subcommittee of  
21 Standards of Care Committee of British Thoracic Society. British Thoracic Society guidelines  
22 on diagnostic flexible bronchoscopy. *Thorax.* 2001;**56 Suppl 1**:i1-21.  
23  
24

25  
26  
27 22 Broekema M, ten Hacken NH, Volbeda F, *et al.* Airway epithelial changes in smokers but  
28 not in ex-smokers with asthma. *Am J Respir Crit Care Med.* 2009;**180** (suppl 12):1170-1178.  
29  
30

31  
32 23 Komaki Y, Sugiura H, Koarai A, *et al.* Cytokine-mediated xanthine oxidase upregulation in  
33 chronic obstructive pulmonary disease's airways. *Pulm Pharmacol Ther.* 2005;**18** (suppl  
34 4):297-302.  
35  
36

37  
38  
39 24 Ishizaka A, Watanabe M, Yamashita T, *et al.* New bronchoscopic microsample probe to  
40 measure the biochemical constituents in epithelial lining fluid of patients with acute  
41 respiratory distress syndrome. *Crit Care Med.* 2001;**29** (suppl 4):896-898.  
42  
43

44  
45  
46 25 Kelsen SG, Mardini IA, Zhou S, *et al.* A technique to harvest viable tracheobronchial  
47 epithelial cells from living human donors. *Am J Respir Cell Mol Biol.* 1992;**7** (suppl 1):66-72.  
48  
49

50  
51  
52 26 Luijk B, Lindemans CA, Kanters D, *et al.* Gradual increase in priming of human  
53 eosinophils during extravasation from peripheral blood to the airways in response to allergen  
54 challenge. *J Allergy Clin Immunol.* 2005;**115** (suppl 5):997-1003.  
55  
56  
57  
58  
59  
60

- 1  
2  
3 27 Koenderman L, Kanters D, Maesen B, *et al.* Monitoring of neutrophil priming in whole  
4 blood by antibodies isolated from a synthetic phage antibody library. *J Leukoc Biol.* 2000;**68**  
5 (suppl 1):58-64.  
6  
7  
8  
9  
10 28 Oudijk EJ, Lo Tam Loi AT, Langereis JD, *et al.* Functional antagonism by GM-CSF on  
11 TNF-alpha-induced CD83 expression in human neutrophils. *Mol Immunol.* 2008;**46** (suppl  
12 1):91-96.  
13  
14  
15  
16  
17 29 Huijsmans RJ, de Haan A, ten Hacken NN, *et al.* The clinical utility of the GOLD  
18 classification of COPD disease severity in pulmonary rehabilitation. *Respir Med.* 2008;**102**  
19 (suppl 1):162-171.  
20  
21  
22  
23  
24 30 O'Neil SE, Lundback B, Lotvall J. Proteomics in asthma and COPD phenotypes and  
25 endotypes for biomarker discovery and improved understanding of disease entities. *J*  
26 *Proteomics.* 2011;**75** (suppl 1):192-201.  
27  
28  
29  
30  
31 31 Anderson GP. Endotyping asthma: new insights into key pathogenic mechanisms in a  
32 complex, heterogeneous disease. *Lancet.* 2008;**372** (suppl 9643):1107-1119.  
33  
34  
35  
36  
37 32 Vestbo J, Anderson W, Coxson HO, *et al.* Evaluation of COPD Longitudinally to Identify  
38 Predictive Surrogate End-points (ECLIPSE). *Eur Respir J.* 2008;**31** (suppl 4):869-873.  
39  
40  
41  
42 33 Agusti A, Calverley PM, Celli B, *et al.* Characterisation of COPD heterogeneity in the  
43 ECLIPSE cohort. *Respir Res.* 2010;**11**:122.  
44  
45  
46  
47 34 Vestbo J, Edwards LD, Scanlon PD, *et al.* Changes in forced expiratory volume in 1  
48 second over time in COPD. *N Engl J Med.* 2011;**365** (suppl 13):1184-1192.  
49  
50  
51  
52 35 Qiu W, Cho MH, Riley JH, *et al.* Genetics of sputum gene expression in chronic  
53 obstructive pulmonary disease. *PLoS One.* 2011;**6** (suppl 9):e24395.  
54  
55  
56  
57  
58  
59  
60

1  
2  
3 36 Castaldi PJ, Cho MH, Litonjua AA, *et al.* The Association of Genome-Wide Significant  
4 Spirometric Loci with Chronic Obstructive Pulmonary Disease Susceptibility. *Am J Respir*  
5 *Cell Mol Biol.* 2011;**45** (suppl 6):1147-1153.  
6  
7

8  
9  
10 37 Lomas DA, Silverman EK, Edwards LD, *et al.* Serum surfactant protein D is steroid  
11 sensitive and associated with exacerbations of COPD. *Eur Respir J.* 2009;**34** (suppl 1):95-  
12 102.  
13  
14

15  
16  
17 38 Sin DD, Miller BE, Duvoix A, *et al.* Serum PARC/CCL-18 concentrations and health  
18 outcomes in chronic obstructive pulmonary disease. *Am J Respir Crit Care Med.* 2011;**183**  
19 (suppl 9):1187-1192.  
20  
21  
22

23  
24 39 Pillai SG, Kong X, Edwards LD, *et al.* Loci identified by genome-wide association studies  
25 influence different disease-related phenotypes in chronic obstructive pulmonary disease. *Am*  
26 *J Respir Crit Care Med.* 2010;**182** (suppl 12):1498-1505.  
27  
28  
29

30  
31 40 Sin DD, Anthonisen NR, Soriano JB, *et al.* Mortality in COPD: Role of comorbidities. *Eur*  
32 *Respir J.* 2006;**28** (suppl 6):1245-1257.  
33  
34  
35

36  
37 41 Anthonisen NR, Skeans MA, Wise RA, *et al.* The effects of a smoking cessation  
38 intervention on 14.5-year mortality: a randomized clinical trial. *Ann Intern Med.* 2005;**142**  
39 (suppl 4):233-239.  
40  
41  
42  
43  
44  
45  
46  
47  
48  
49  
50  
51  
52  
53  
54  
55  
56  
57  
58  
59  
60

1  
2  
3  
4  
5  
6  
7  
8  
9  
10  
11  
12  
13  
14  
15  
16  
17  
18  
19  
20  
21  
22  
23  
24  
25  
26  
27  
28  
29  
30  
31  
32  
33  
34  
35  
36  
37  
38  
39  
40  
41  
42  
43  
44  
45  
46  
47  
48  
49  
50  
51  
52  
53  
54  
55  
56  
57  
58  
59  
60

**Figure 1 Acute smoking effects in the lung**

**Figure 2 General hypothesis about the role of systemic inflammation**

For peer review only

1  
2  
3  
4  
5  
6  
7  
8  
9  
10  
11  
12  
13  
14  
15  
16  
17  
18  
19  
20  
21  
22  
23  
24  
25  
26  
27  
28  
29  
30  
31  
32  
33  
34  
35  
36  
37  
38  
39  
40  
41  
42  
43  
44  
45  
46  
47  
48  
49  
50  
51  
52  
53  
54  
55  
56  
57  
58  
59  
60

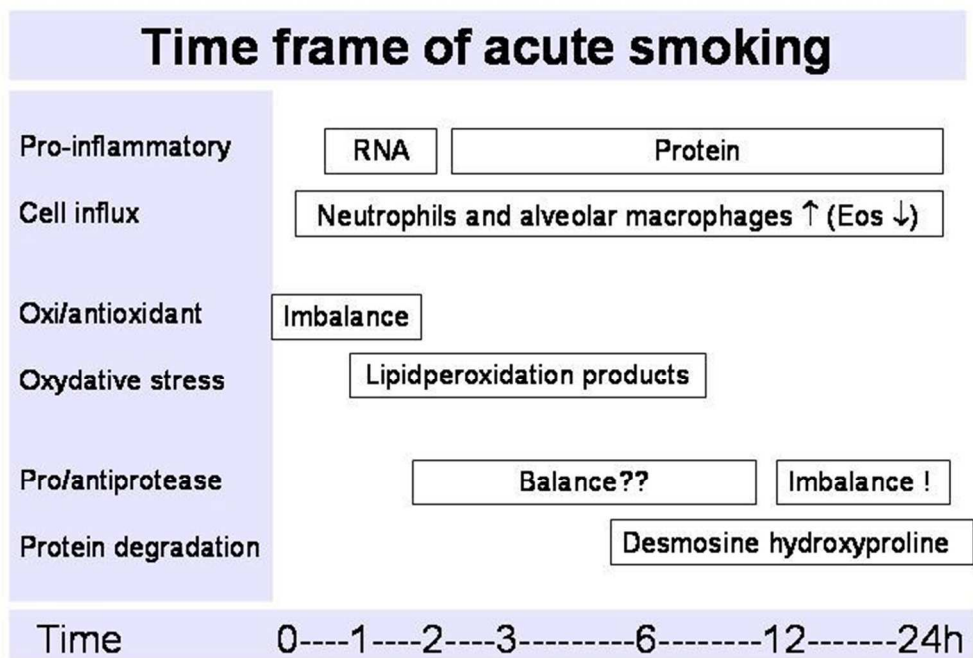

189x134mm (96 x 96 DPI)

view only

1  
2  
3  
4  
5  
6  
7  
8  
9  
10  
11  
12  
13  
14  
15  
16  
17  
18  
19  
20  
21  
22  
23  
24  
25  
26  
27  
28  
29  
30  
31  
32  
33  
34  
35  
36  
37  
38  
39  
40  
41  
42  
43  
44  
45  
46  
47  
48  
49  
50  
51  
52  
53  
54  
55  
56  
57  
58  
59  
60

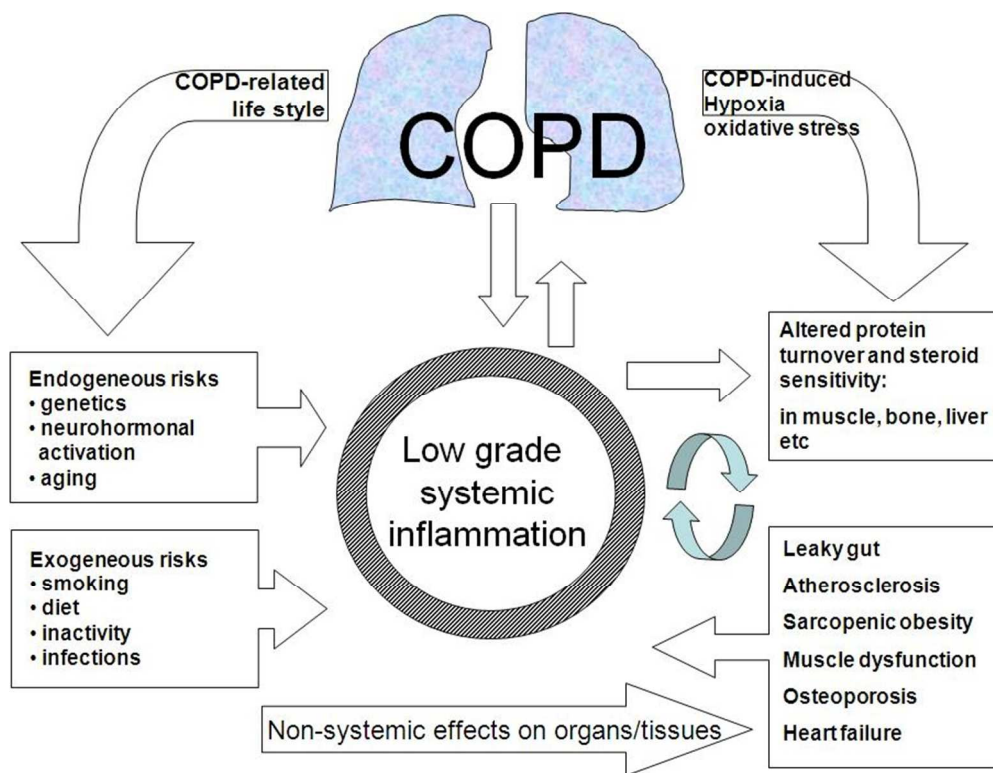

241x184mm (96 x 96 DPI)

Review only

# Please wait...

If this message is not eventually replaced by the proper contents of the document, your PDF viewer may not be able to display this type of document.

You can upgrade to the latest version of Adobe Reader for Windows®, Mac, or Linux® by visiting [http://www.adobe.com/go/reader\\_download](http://www.adobe.com/go/reader_download).

For more assistance with Adobe Reader visit <http://www.adobe.com/go/acrreader>.

Windows is either a registered trademark or a trademark of Microsoft Corporation in the United States and/or other countries. Mac is a trademark of Apple Inc., registered in the United States and other countries. Linux is the registered trademark of Linus Torvalds in the U.S. and other countries.

# Please wait...

If this message is not eventually replaced by the proper contents of the document, your PDF viewer may not be able to display this type of document.

You can upgrade to the latest version of Adobe Reader for Windows®, Mac, or Linux® by visiting [http://www.adobe.com/go/reader\\_download](http://www.adobe.com/go/reader_download).

For more assistance with Adobe Reader visit <http://www.adobe.com/go/acrreader>.

Windows is either a registered trademark or a trademark of Microsoft Corporation in the United States and/or other countries. Mac is a trademark of Apple Inc., registered in the United States and other countries. Linux is the registered trademark of Linus Torvalds in the U.S. and other countries.



# Please wait...

If this message is not eventually replaced by the proper contents of the document, your PDF viewer may not be able to display this type of document.

You can upgrade to the latest version of Adobe Reader for Windows®, Mac, or Linux® by visiting [http://www.adobe.com/go/reader\\_download](http://www.adobe.com/go/reader_download).

For more assistance with Adobe Reader visit <http://www.adobe.com/go/acrreader>.

Windows is either a registered trademark or a trademark of Microsoft Corporation in the United States and/or other countries. Mac is a trademark of Apple Inc., registered in the United States and other countries. Linux is the registered trademark of Linus Torvalds in the U.S. and other countries.

# Please wait...

If this message is not eventually replaced by the proper contents of the document, your PDF viewer may not be able to display this type of document.

You can upgrade to the latest version of Adobe Reader for Windows®, Mac, or Linux® by visiting [http://www.adobe.com/go/reader\\_download](http://www.adobe.com/go/reader_download).

For more assistance with Adobe Reader visit <http://www.adobe.com/go/acrreader>.

Windows is either a registered trademark or a trademark of Microsoft Corporation in the United States and/or other countries. Mac is a trademark of Apple Inc., registered in the United States and other countries. Linux is the registered trademark of Linus Torvalds in the U.S. and other countries.

# Please wait...

If this message is not eventually replaced by the proper contents of the document, your PDF viewer may not be able to display this type of document.

You can upgrade to the latest version of Adobe Reader for Windows®, Mac, or Linux® by visiting [http://www.adobe.com/go/reader\\_download](http://www.adobe.com/go/reader_download).

For more assistance with Adobe Reader visit <http://www.adobe.com/go/acrreader>.

Windows is either a registered trademark or a trademark of Microsoft Corporation in the United States and/or other countries. Mac is a trademark of Apple Inc., registered in the United States and other countries. Linux is the registered trademark of Linus Torvalds in the U.S. and other countries.

# Please wait...

If this message is not eventually replaced by the proper contents of the document, your PDF viewer may not be able to display this type of document.

You can upgrade to the latest version of Adobe Reader for Windows®, Mac, or Linux® by visiting [http://www.adobe.com/go/reader\\_download](http://www.adobe.com/go/reader_download).

For more assistance with Adobe Reader visit <http://www.adobe.com/go/acrreader>.

Windows is either a registered trademark or a trademark of Microsoft Corporation in the United States and/or other countries. Mac is a trademark of Apple Inc., registered in the United States and other countries. Linux is the registered trademark of Linus Torvalds in the U.S. and other countries.

# Please wait...

If this message is not eventually replaced by the proper contents of the document, your PDF viewer may not be able to display this type of document.

You can upgrade to the latest version of Adobe Reader for Windows®, Mac, or Linux® by visiting [http://www.adobe.com/go/reader\\_download](http://www.adobe.com/go/reader_download).

For more assistance with Adobe Reader visit <http://www.adobe.com/go/acrreader>.

Windows is either a registered trademark or a trademark of Microsoft Corporation in the United States and/or other countries. Mac is a trademark of Apple Inc., registered in the United States and other countries. Linux is the registered trademark of Linus Torvalds in the U.S. and other countries.

# Please wait...

If this message is not eventually replaced by the proper contents of the document, your PDF viewer may not be able to display this type of document.

You can upgrade to the latest version of Adobe Reader for Windows®, Mac, or Linux® by visiting [http://www.adobe.com/go/reader\\_download](http://www.adobe.com/go/reader_download).

For more assistance with Adobe Reader visit <http://www.adobe.com/go/acrreader>.

Windows is either a registered trademark or a trademark of Microsoft Corporation in the United States and/or other countries. Mac is a trademark of Apple Inc., registered in the United States and other countries. Linux is the registered trademark of Linus Torvalds in the U.S. and other countries.

# Please wait...

If this message is not eventually replaced by the proper contents of the document, your PDF viewer may not be able to display this type of document.

You can upgrade to the latest version of Adobe Reader for Windows®, Mac, or Linux® by visiting [http://www.adobe.com/go/reader\\_download](http://www.adobe.com/go/reader_download).

For more assistance with Adobe Reader visit <http://www.adobe.com/go/acrreader>.

Windows is either a registered trademark or a trademark of Microsoft Corporation in the United States and/or other countries. Mac is a trademark of Apple Inc., registered in the United States and other countries. Linux is the registered trademark of Linus Torvalds in the U.S. and other countries.

# Please wait...

If this message is not eventually replaced by the proper contents of the document, your PDF viewer may not be able to display this type of document.

You can upgrade to the latest version of Adobe Reader for Windows®, Mac, or Linux® by visiting [http://www.adobe.com/go/reader\\_download](http://www.adobe.com/go/reader_download).

For more assistance with Adobe Reader visit <http://www.adobe.com/go/acrreader>.

Windows is either a registered trademark or a trademark of Microsoft Corporation in the United States and/or other countries. Mac is a trademark of Apple Inc., registered in the United States and other countries. Linux is the registered trademark of Linus Torvalds in the U.S. and other countries.



# Please wait...

If this message is not eventually replaced by the proper contents of the document, your PDF viewer may not be able to display this type of document.

You can upgrade to the latest version of Adobe Reader for Windows®, Mac, or Linux® by visiting [http://www.adobe.com/go/reader\\_download](http://www.adobe.com/go/reader_download).

For more assistance with Adobe Reader visit <http://www.adobe.com/go/acrreader>.

Windows is either a registered trademark or a trademark of Microsoft Corporation in the United States and/or other countries. Mac is a trademark of Apple Inc., registered in the United States and other countries. Linux is the registered trademark of Linus Torvalds in the U.S. and other countries.

# Please wait...

If this message is not eventually replaced by the proper contents of the document, your PDF viewer may not be able to display this type of document.

You can upgrade to the latest version of Adobe Reader for Windows®, Mac, or Linux® by visiting [http://www.adobe.com/go/reader\\_download](http://www.adobe.com/go/reader_download).

For more assistance with Adobe Reader visit <http://www.adobe.com/go/acrreader>.

Windows is either a registered trademark or a trademark of Microsoft Corporation in the United States and/or other countries. Mac is a trademark of Apple Inc., registered in the United States and other countries. Linux is the registered trademark of Linus Torvalds in the U.S. and other countries.

# Please wait...

If this message is not eventually replaced by the proper contents of the document, your PDF viewer may not be able to display this type of document.

You can upgrade to the latest version of Adobe Reader for Windows®, Mac, or Linux® by visiting [http://www.adobe.com/go/reader\\_download](http://www.adobe.com/go/reader_download).

For more assistance with Adobe Reader visit <http://www.adobe.com/go/acrreader>.

Windows is either a registered trademark or a trademark of Microsoft Corporation in the United States and/or other countries. Mac is a trademark of Apple Inc., registered in the United States and other countries. Linux is the registered trademark of Linus Torvalds in the U.S. and other countries.



**Acute and chronic inflammatory responses induced by smoking in individuals being susceptible and non-susceptible for development of COPD: phenotyping towards novel therapy: protocol of a cross-sectional study**

|                               |                                                                                                                                                                                                                                                                                                                                                                                                                                                                                                                                                                                                                                                                                                                                                                                                                                                                                                                                                                                                                                                                                                                                                                                                                                                                                                                                                                                                                                                                                                                                                                                                                                                                                                                                                                                                                                                                                                                                                                                                                 |
|-------------------------------|-----------------------------------------------------------------------------------------------------------------------------------------------------------------------------------------------------------------------------------------------------------------------------------------------------------------------------------------------------------------------------------------------------------------------------------------------------------------------------------------------------------------------------------------------------------------------------------------------------------------------------------------------------------------------------------------------------------------------------------------------------------------------------------------------------------------------------------------------------------------------------------------------------------------------------------------------------------------------------------------------------------------------------------------------------------------------------------------------------------------------------------------------------------------------------------------------------------------------------------------------------------------------------------------------------------------------------------------------------------------------------------------------------------------------------------------------------------------------------------------------------------------------------------------------------------------------------------------------------------------------------------------------------------------------------------------------------------------------------------------------------------------------------------------------------------------------------------------------------------------------------------------------------------------------------------------------------------------------------------------------------------------|
| Journal:                      | <i>BMJ Open</i>                                                                                                                                                                                                                                                                                                                                                                                                                                                                                                                                                                                                                                                                                                                                                                                                                                                                                                                                                                                                                                                                                                                                                                                                                                                                                                                                                                                                                                                                                                                                                                                                                                                                                                                                                                                                                                                                                                                                                                                                 |
| Manuscript ID:                | bmjopen-2012-002178.R1                                                                                                                                                                                                                                                                                                                                                                                                                                                                                                                                                                                                                                                                                                                                                                                                                                                                                                                                                                                                                                                                                                                                                                                                                                                                                                                                                                                                                                                                                                                                                                                                                                                                                                                                                                                                                                                                                                                                                                                          |
| Article Type:                 | Protocol                                                                                                                                                                                                                                                                                                                                                                                                                                                                                                                                                                                                                                                                                                                                                                                                                                                                                                                                                                                                                                                                                                                                                                                                                                                                                                                                                                                                                                                                                                                                                                                                                                                                                                                                                                                                                                                                                                                                                                                                        |
| Date Submitted by the Author: | 17-Dec-2012                                                                                                                                                                                                                                                                                                                                                                                                                                                                                                                                                                                                                                                                                                                                                                                                                                                                                                                                                                                                                                                                                                                                                                                                                                                                                                                                                                                                                                                                                                                                                                                                                                                                                                                                                                                                                                                                                                                                                                                                     |
| Complete List of Authors:     | Lo Tam Loi, Adèle; University Medical Center Utrecht, Department of Respiratory Medicine<br>Hoonhorst, Susan; University of Groningen, University Medical Center Groningen, Department of Pulmonary Disease; GRIAC research institute, University of Groningen,<br>Franciosi, Lorenza; University of Groningen, Department of Pharmacy, Analytical Biochemistry; GRIAC research institute, University of Groningen,<br>Bischoff, Rainer; University of Groningen, Department of Pharmacy, Analytical Biochemistry; GRIAC research institute, University of Groningen,<br>Hoffmann, Roland; University of Groningen, University Medical Center Groningen, Department of Pathology & Medical Biology; GRIAC research institute, University of Groningen,<br>Heijink, Irene; University of Groningen, University Medical Center Groningen, Department of Pathology & Medical Biology; GRIAC research institute, University of Groningen,<br>van Oosterhout, Antoon; University of Groningen, University Medical Center Groningen, Department of Pathology & Medical Biology; GRIAC research institute, University of Groningen,<br>Boezen, H. Marike; University of Groningen, University Medical Center Groningen, Department of Epidemiology; GRIAC research institute, University of Groningen,<br>Timens, Wim; University of Groningen, University Medical Center Groningen, Department of Pathology & Medical Biology; GRIAC research institute, University of Groningen,<br>Postma, Dirkje; University of Groningen, University Medical Center Groningen, Department of Pulmonary Disease; GRIAC research institute, University of Groningen,<br>Lammers, Jan-Willem; University Medical Center Utrecht, Department of Respiratory Medicine<br>Koenderman, Leo; University Medical Center Utrecht, Department of Respiratory Medicine<br>ten Hacken, Nick; University of Groningen, University Medical Center Groningen, Department of Pulmonary Disease; GRIAC research institute, University of Groningen, |
| <b>Primary Subject            | Respiratory medicine                                                                                                                                                                                                                                                                                                                                                                                                                                                                                                                                                                                                                                                                                                                                                                                                                                                                                                                                                                                                                                                                                                                                                                                                                                                                                                                                                                                                                                                                                                                                                                                                                                                                                                                                                                                                                                                                                                                                                                                            |

1  
2  
3  
4  
5  
6  
7  
8  
9  
10  
11  
12  
13  
14  
15  
16  
17  
18  
19  
20  
21  
22  
23  
24  
25  
26  
27  
28  
29  
30  
31  
32  
33  
34  
35  
36  
37  
38  
39  
40  
41  
42  
43  
44  
45  
46  
47  
48  
49  
50  
51  
52  
53  
54  
55  
56  
57  
58  
59  
60

|                            |                                                                           |
|----------------------------|---------------------------------------------------------------------------|
| Heading</b>:               |                                                                           |
| Secondary Subject Heading: | Smoking and tobacco                                                       |
| Keywords:                  | COPD, Inflammation, Susceptibility, Corticosteroid insensitivity, Smoking |
|                            |                                                                           |

SCHOLARONE™  
Manuscripts

For peer review only

1  
2  
3 **Acute and chronic inflammatory responses induced by smoking in individuals being**  
4 **susceptible and non-susceptible for development of COPD: from specific disease**  
5 **phenotyping towards novel therapy: protocol of a cross-sectional study**  
6  
7

8  
9 *Short title: Acute and chronic smoking effects and susceptibility to COPD*  
10

11  
12 Adèle T Lo Tam Loi<sup>1</sup>, Susan JM Hoonhorst<sup>2,6</sup>, Lorenza Franciosi<sup>3,6</sup>, Rainer Bischoff<sup>3,6</sup>, Roland  
13 F Hoffmann<sup>4,6</sup>, Irene Heijink<sup>4,6</sup>, Antoon JM van Oosterhout<sup>4,6</sup>, H. Marike Boezen<sup>5,6</sup>, Wim  
14 Timens<sup>4,6</sup>, Dirkje S Postma<sup>2,6</sup>, Jan-Willem Lammers<sup>1</sup>, Leo Koenderman<sup>1</sup>, Nick HT ten  
15 Hacken<sup>2,6</sup>  
16  
17

18  
19  
20 <sup>1</sup> *Department of Respiratory Medicine, University Medical Center Utrecht, the Netherlands*

21 <sup>2</sup> *Department of Pulmonary Disease, University of Groningen, University Medical Center*  
22 *Groningen, the Netherlands*  
23

24 <sup>3</sup> *Department of Pharmacy, Analytical Biochemistry, University of Groningen, the Netherlands*

25 <sup>4</sup> *Department of Pathology & Medical Biology, University of Groningen, University Medical*  
26 *Center Groningen, the Netherlands*  
27

28 <sup>5</sup> *Department of Epidemiology, University of Groningen, University Medical Center Groningen,*  
29 *the Netherlands*  
30

31 <sup>6</sup> *GRIAC research institute, University of Groningen, the Netherlands*  
32  
33

34  
35 **Corresponding author:**

36 Dr. N.H.T. ten Hacken

37 Dept. of Pulmonary diseases

38 University Medical Center Groningen

39 Hanzeplein 1

40 9713 GZ Groningen

41 The Netherlands

42 phone: +31-50-3614574

43 Fax: +31-50-3619320

44 n.h.t.ten.hacken@umcg.nl  
45  
46  
47  
48  
49

50  
51 **Keywords**

52 COPD, Inflammation, Susceptibility, Corticosteroid insensitivity, Smoking  
53  
54  
55

56 **Word count** 3733  
57  
58  
59  
60

**ABSTRACT***(Word count = 300)*

**Introduction:** Chronic obstructive pulmonary disease (COPD) is a heterogeneous disease with pulmonary and extra-pulmonary manifestations. Although COPD is a complex disease, the diagnosis and staging are still based on simple spirometry measurements. Different COPD phenotypes exist based on clinical, physiological, immunological, and radiological observations. Cigarette smoking is the most important risk factor for COPD, but only 15-20% of smokers develop the disease, suggesting a genetic predisposition. Unfortunately, little is known about the pathogenesis of COPD, and even less on the very first steps that are associated with an aberrant response to smoke exposure.

This study aims to investigate the underlying local and systemic inflammation of different clinical COPD phenotypes, and acute effects of cigarette smoke exposure in individuals susceptible and non-susceptible for the development of COPD. Furthermore, we will investigate mechanisms associated with corticosteroid insensitivity. Our study will provide valuable information regarding the pathogenetic mechanisms underlying the natural course of COPD.

**Methods and analysis:** This cross-sectional study will include young and old individuals susceptible or non-susceptible to develop COPD. At young age (18-40 years) 60 “party smokers” will be included that are called susceptible or non-susceptible based on COPD prevalence in smoking family members. Additionally, 30 healthy smokers (age 40-75 years) and 110 COPD patients will be included. Measurements will include questionnaires, pulmonary function, low-dose CT scanning of the lung, body composition, 6-min-walking distance, and biomarkers in peripheral blood, sputum, urine, exhaled breath condensate, epithelial lining fluid, bronchial brushes and biopsies. Non-biased approaches such as proteomics will be performed in blood and epithelial lining fluid.

**Ethics and dissemination:** This multicenter study was approved by the medical ethical committees of UMC Groningen and Utrecht, the Netherlands. The study findings will be presented at conferences and will be reported in peer-reviewed journals.

**Trial registration:** ClinicalTrials.gov, NCT00807469 (study 1) and NCT00850863 (study 2).

## ARTICLE SUMMARY

### Article focus

This article describes the study protocol of a cross-sectional study investigating the underlying local and systemic inflammation of different clinical COPD phenotypes, and acute effects of cigarette smoke exposure in individuals susceptible and non-susceptible for the development of COPD.

### Key messages

- Young (18-40) and older (40-75) individuals who are susceptible and non-susceptible to develop COPD are included.
- All groups are extensively phenotyped by clinical, physiological, immunological, and radiographical characterisation. Furthermore, effects of acute smoking are studied.

### Strengths and limitations of the study

- Extensive characterisation of a well defined study population, providing valuable information regarding the pathogenic mechanisms underlying the natural cause of COPD.
- Recruitment of a population with high and low familiar risk to develop COPD.



## BACKGROUND

Chronic obstructive pulmonary disease (COPD) is a major cause of morbidity and mortality worldwide(1). The disease is characterized by persistent and progressive expiratory airflow obstruction (post-bronchodilator  $FEV_1/FVC < 0.70$ ) and its severity is based on  $FEV_1$  %predicted(1). Cigarette smoking is the most important risk factor for COPD in the western world, but only 15-20 % of young smokers will eventually develop the disease, suggesting a genetic predisposition. So far, the genetic background of these susceptible smokers has not been elucidated(2). Unravelling the underlying pathogenetic mechanisms of COPD is difficult because it takes 20-30 years of smoking before susceptible smokers develop established COPD. Also, there is the problem that COPD has many clinical expressions, and we just have started to learn how to phenotype this heterogeneous disease. Finally, there are many other risk factors that may modulate the complex interaction between the genetic background and smoking, like *in utero* events, microbial infections, dietary factors, physical inactivity and pharmacological treatment.

It is well accepted that the spirometry measurements ( $FEV_1$  and FVC) are largely insufficient to diagnose and classify COPD(1). With the increased recognition of the various clinical expressions of COPD, consensus is growing that COPD represents a spectrum of overlapping diseases with important extra-pulmonary consequences. Phenotypes of COPD may be classified according to four domains: clinical, physiological, immunological and radiographical(3).

- Clinical distinctions are generally based on dyspnea scores, frequency of exacerbations, body mass, muscle wasting, corticosteroid responsiveness, depression / anxiety, co-morbidity, and healthy status(4).
- Physiological distinctions may be based on the degree of airflow limitation, decline in lung function, bronchodilator responsiveness, airway hyperresponsiveness, CO diffusion capacity, hyperinflation, body-plethysmography, bio-impedance, and exercise tolerance.

- Immunological features comprise the type and severity of local and systemic immunological processes in the lung and systemic compartment. In blood leukocytes cytokines, and mediators may affect the functionality of extra-pulmonary tissues and organs, leading to COPD-associated co-morbid conditions.
- Radiographic distinctions may be based on the presence of various forms and severity of emphysema, thickened large airways, and small airways abnormality on high-resolution computed tomography scans.

Although systemic inflammation and multi-organ pathology have been put forward as important features of COPD, surprisingly little is known about the underlying pathogenesis. Most COPD studies in this field included small numbers of individuals, focused on more severe stages of COPD, characterized subjects clinically on the basis of few arbitrary pulmonary measurements, did not take into account the genetic background and paid limited attention to different aspects of systemic inflammation. In addition, most studies assumed that assessment of cytokines by multiplex assays (e.g. Luminex) is sufficient to accurately describe the systemic inflammatory response. Unfortunately, many caveats are present that preclude a complete insight in this response, e.g.:

- not all cytokines implicated in COPD are known,
- little effort is taken to measure anti-inflammatory cytokines (the balance between pro- and anti-inflammatory signals will probably determine the extent and type of inflammation),
- different pro-inflammatory cytokines can act as heterologous antagonists (inhibit the effects of other cytokines).
- the kinetics of cytokines is very dynamic and no consensus is present regarding an optimal single time point for blood collection.

In the present study we set out to characterize systemic inflammation by an alternative approach. Innate immune cells will be used as integrators of pro- and anti-inflammatory

1  
2  
3 signals. We hypothesize that subtle changes in the phenotype of granulocytes and  
4  
5 monocytes are caused by an “inflammatory imprinting” of these cells.  
6  
7

8  
9 Cigarette smoking is the main risk factor for developing COPD. Repetitive acute effects of  
10  
11 cigarette smoke exposure may accumulate and after many years lead to irreversible lung  
12  
13 damage. To understand the changes in the lung due to chronic smoking we believe that it is  
14  
15 important to first investigate the exact immunological responses to an acute smoke exposure  
16  
17 event, particularly in “naive” lungs that are not yet affected by chronic smoke exposure. The  
18  
19 acute (<24 hours) effects of smoking in humans, animals and cell cultures have been  
20  
21 extensively reviewed some years ago by van der Vaart and colleagues(5). If we integrate all  
22  
23 available data on acute smoking we are able to construct a hypothetical time frame for the  
24  
25 acute effects of smoking (figure 1). One of the very first insults on the bronchial system is by  
26  
27 oxidants present in cigarette smoke. After local depletion of anti-oxidants, the first oxidative  
28  
29 stress products can be measured within 1 hour. These products will disappear within 6  
30  
31 hours. There is a surprisingly fast influx of inflammatory cells; even faster than the synthesis  
32  
33 of some pro-inflammatory cytokines (TNF-alpha, IL-1beta, IL-8). The exact time period at  
34  
35 which the proteinase / antiproteinase balance is affected is unknown; however, protein  
36  
37 degradation is measurable within 6 hours after smoking. Unfortunately, until now, only a few  
38  
39 studies have investigated the acute effects of cigarette smoking in humans(5). These studies  
40  
41 included only small numbers of individuals, characterized subjects mainly on basis of  
42  
43 pulmonary measurements, paid no attention to the genetic background and paid limited  
44  
45 attention to different aspects of pulmonary inflammation.  
46  
47

48  
49 Corticosteroids provide little therapeutic benefit in a relatively large group of COPD patients,  
50  
51 despite their broad anti-inflammatory effects. Our goal is to identify common markers in  
52  
53 peripheral blood monocytes, skin and lung epithelial cells that might contribute to  
54  
55 corticosteroid insensitivity. Recently, the GLUCOLD study demonstrated beneficial effects on  
56  
57 airway wall inflammation and decline in lung function yet with large inter-individual  
58  
59  
60

1  
2  
3 differences(6). *In vitro* studies have shown that the ability of dexamethasone to suppress  
4 cytokine release (e.g. IL-8) from alveolar macrophages is impaired in COPD patients as  
5 compared to healthy smokers(7). Furthermore, alveolar macrophages from healthy smokers  
6 are more resistant to corticosteroids than macrophages from non-smokers(8). This relative  
7 steroid insensitivity may, in part, be explained by a suppressive effect of cigarette smoke-  
8 induced oxidative stress. This suppression may particularly play a role in the airway  
9 epithelium, where cells are in first contact with cigarette smoke and form an important source  
10 of mediators involved in the induction of neutrophilic airway inflammation (e.g. the  
11 chemoattractant IL-8). It may well be that corticosteroid insensitivity is gradually acquired by  
12 smoking in COPD, and one might hypothesize that smokers who develop COPD are more  
13 prone to have signs of corticosteroid insensitivity.  
14  
15  
16  
17  
18  
19  
20  
21  
22  
23  
24

### 25 26 27 **General hypotheses**

28  
29 There is a clear need to better understand all factors that contribute to the development of  
30 COPD and its different phenotypes. This study focuses on the pathogenesis and clinical  
31 expression of smoking-induced COPD, studied both in the pulmonary and the systemic  
32 compartments. The following general hypothesis is put forward by our consortium (figure 2):  
33  
34  
35  
36  
37  
38

39  
40 *“COPD is a multi-organ disease situated in both the lung and extra-pulmonary organs and*  
41 *tissues. Dysfunction of the latter tissues is exemplified by muscle atrophy, impaired muscle*  
42 *oxidative capacity, osteoporosis, atherosclerosis and heart failure. A low-grade systemic*  
43 *inflammation plays a pivotal role in the induction and perpetuation of this multi-organ*  
44 *disease. Smoking and persistent production of inflammatory mediators from the lung are*  
45 *inducers of systemic inflammation. Other risk factors such as diet deficiencies, sedentary life*  
46 *style, and frequent infections contribute independently to further amplification of systemic*  
47 *inflammation. In more advanced COPD the extra-pulmonary pathology starts to contribute to*  
48 *disease severity and a vicious circle of persistent difficulty to treat inflammation.*  
49 *Consequently, local and systemic inflammation should be reduced in all stages of disease by*  
50  
51  
52  
53  
54  
55  
56  
57  
58  
59  
60

1  
2  
3 reversing negative life style factors and applying successful anti-inflammatory treatment  
4 modalities. In more advanced stages multimodal interventions additionally should improve  
5 impaired tissue functions. An important contributing problem is the relative corticosteroid  
6 insensitivity of both lung and peripheral tissue responses in COPD.”  
7  
8  
9

### 10 11 12 13 **Aims of the study**

- 14  
15 • To assess systemic and local inflammation at baseline in:
  - 16  
17 a) young healthy individuals with low number of pack years smoking who have a  
18 high and low familial risk to develop COPD;
  - 19  
20 b) older individuals with higher number of pack years who either have normal lung  
21 function or COPD.  
22  
23
- 24  
25 We hypothesize that young susceptible individuals and COPD patients demonstrate a  
26 higher degree and different type of local and systemic inflammation at baseline.  
27
- 28  
29 • To study systemic and local inflammation after acute smoke exposure in the above  
30 groups. We hypothesize that young susceptible individuals and COPD patients  
31 demonstrate a higher and aberrant local and systemic inflammatory response to cigarette  
32 smoke.  
33  
34
- 35  
36 • To compare in bronchial epithelial cells and PBMCs corticosteroid responsiveness *in vitro*  
37 between susceptible and non-susceptible individuals. To study in these cells the effects  
38 of cigarette smoking and to elucidate underlying mechanisms of corticosteroid  
39 unresponsiveness.  
40  
41
- 42  
43 • To determine whether the type and severity of the systemic inflammatory response contributes  
44 to the clinical outcome of COPD. We hypothesize that the type and severity of systemic  
45 inflammation have profound effects on the clinical picture of COPD.  
46  
47
- 48  
49 • To investigate the relationship between downstream genetic effects (transcriptome, proteome)  
50 and specific COPD phenotypes in peripheral blood and lung tissue (induced sputum, bronchial  
51 biopsies, epithelial lining fluid).  
52  
53  
54  
55  
56  
57  
58  
59  
60

## METHODS

### Study population

In total 200 old and young individuals who are susceptible or not susceptible to develop COPD will be recruited (table 1). At old age (>40 years), 30 healthy smokers (>20 pack years) and 110 COPD patients (>10 pack years) will be enrolled in the study. At young age, 60 “party smokers” with a normal lung function will be included with a high or low prevalence of COPD in smoking family members (see table 1). Party smoking was defined by irregularly smoking and/or able to quit smoking for at least two days. Exclusion criteria are:  $\alpha$ -1-antitrypsin-deficiency, acute pulmonary infections (like tuberculosis, pneumonia, flue, tracheobronchitis), prior history of significant inflammatory lung disease other than COPD (sarcoidosis, pulmonary fibrosis, silicosis, ect.), active infections (such as hepatitis A-C, cystitis, gastro-enteritis etc.), treatment with antibiotics or corticosteroids within 8 weeks, taking part in another study, recent diagnosis of cancer. Medication such as NSAIDs and immunosuppressive agents which could affect the results of the study will be excluded, as well as substance abuse. Co-morbidities that might lead to study-related (serious) adverse events will be excluded on basis of an arbitrary selection of conditions listed in the ACE-27 co-morbidity scale(9).

**Table 1 Study population**

| Disease                | No | Age (Yrs) | Smoking status | Pack years | FEV <sub>1</sub> /VC, % | FEV <sub>1</sub> , % pred |
|------------------------|----|-----------|----------------|------------|-------------------------|---------------------------|
| <i>Non-susceptible</i> |    |           |                |            |                         |                           |
| Healthy [A]            | 30 | 18-40     | Party smoking  | 0-10       | > 70                    | > 85                      |
| Healthy [B]            | 30 | 40-75     | Ex or current  | >20        | > 70                    | > 85                      |
| <i>Susceptible</i>     |    |           |                |            |                         |                           |
| Healthy [C]            | 30 | 18-40     | Party smoking  | 0-10       | > 70                    | > 85                      |
| COPD                   |    |           |                |            |                         |                           |
| Stage I [D1]           | 30 | 40-75     | Ex or current  | >10        | ≤ 70                    | > 80                      |
| Stage II [D2]          | 30 | 40-75     |                | >10        | ≤ 70                    | 50-80                     |
| Stage III [D3]         | 30 | 40-75     |                | >10        | ≤ 70                    | 30-50                     |
| Stage IV [D4]*         | 20 | 40-75     |                | >10        | ≤ 70                    | < 30                      |
|                        |    | < 53      |                |            |                         | < 30%                     |

*Susceptibility in young individuals is based on family history. Not susceptible means that none of the smoking family members who are at least 40 years of age have COPD. Susceptible means that the prevalence of COPD in smoking family members older than 40 years is high: 2 out of 2, 2 out of 3 or 3 out of 3, 3 out of 4 or 4 out of 4. Party smoking was defined by irregularly smoking and/or able to quit smoking for at least two days. Alpha-1-antitrypsin deficiency is excluded. \*patients with a FEV<sub>1</sub> 30-50% predicted in combination with chronic respiratory failure also have stage IV.*

### **Study design**

This study is a bi-center cross-sectional study that takes place at the University Medical Centers Utrecht (UMC Utrecht) and Groningen (UMC Groningen). Participating subjects will undergo extensive clinical characterisation (table 2). Local and systemic inflammation will be investigated in several ways. Special attention will be paid to acute smoking and corticosteroid insensitivity in selected subgroups.

Table 2 Measurements

|                       | Measurements                                 | Group      |
|-----------------------|----------------------------------------------|------------|
| <b>Clinical</b>       | Demographics                                 | All        |
|                       | Physical examination                         | All        |
|                       | Peripheral blood (routine measurements)      | All        |
|                       | Presence of metabolic syndrome               | All        |
|                       | ECG                                          | B, D1-4    |
|                       | Bode index                                   | B, D1-4    |
|                       | Fagerstrom Smoking Questionnaire             | All        |
|                       | St Georges Respiratory Questionnaire (SGRQ)  | D1-4       |
|                       | Clinical COPD Questionnaire (CCQ)            | D1-4       |
|                       | SQUASH                                       | All        |
|                       | Urine (microproteins)                        | All        |
|                       | AGE (Advanced Glycation Endproducts)-reader  | All        |
|                       | Skin blanching test                          | All        |
| <b>Physiological</b>  | Flow volume + reversibility                  | All        |
|                       | Body plethysmography                         | All        |
|                       | CO diffusion                                 | All        |
|                       | Methacholine challenge test                  | A,B,C,D1-3 |
|                       | Bioelectrical impedance                      | All        |
|                       | Six minute walking distance                  | B,D1-4     |
| <b>Immunological</b>  | Sputum induction (only baseline)             | A,B,C,D2   |
|                       | Peripheral blood (systemic inflammation)     | All        |
|                       | Peripheral blood 4x (acute smoking)          | A,B,C,D2   |
|                       | Exhaled breath condensate 3x (acute smoking) | A,B,C,D2   |
|                       | Exhaled CO 5x (acute smoking)                | A,B,C,D2   |
|                       | Bronchial biopsy 2x (acute smoking)          | A,B,C,D2   |
|                       | Epithelial lining fluid 2x (acute smoking)   | A,B,C,D2   |
|                       | Epithelial brushes 2x (acute smoking)        | A,B,C,D2   |
| <b>Radiographical</b> | Low dose HRCT-scan lung                      | All        |



### Clinical outcomes

Demographic variables include: age, sex, smoking habits, education, profession, other exposures, height and weight. Risk factors of the metabolic syndrome will be determined including blood pressure, waist hip circumference, lipid profile and fasting glucose (table 2). Questionnaires will be the Clinical COPD Questionnaire (CCQ), the St Georges Respiratory Questionnaire (SGRQ), the Dutch Fagerstrom test for nicotine dependence, and the Short QUestionnaire to ASsess Health-enhancing physical activity (SQUASH)(10-12). Exacerbation frequency will be recorded in COPD patients. The BODE-index will be calculated on basis of FEV<sub>1</sub>, six-minute-walking distance, Body Mass Index (BMI) and MRC-dyspnea score(4). In urine (micro) protein concentration will be assessed. Corticosteroid sensitivity will be measured by the cutaneous vasoconstrictor response to topical budesonide using the skin blanching test(13). Budesonide dissolved in 95% ethanol will be applied to the skin using eight different concentrations (0-1000 µg/ml). Blanching will be scored with a 7-point scale: 0-3 (increasing with steps of 0.5; 0 = no blanching and 3 = intense blanching). Cumulative oxidative stress will be measured in the skin using the non-invasive AGE (Advanced Glycation Endproducts) reader (DiagnOptics, Groningen, The Netherlands)(14).

### Physiological outcomes

Spirometry will be performed according to international guidelines (ERS 2005)(15). We will assess FEV<sub>1</sub>, FEV<sub>1</sub>/FVC, IVC, FEF50, FEF75, reversibility to salbutamol, TLC, FRC (body box), and CO diffusion. Methacholine challenge tests are performed according to international guidelines (ERS 2005), using serial doubling concentrations of methacholine-bromide (0.03 to 38.4 mg/ml) with the 2-min tidal breathing method at 5-minute intervals. The six-minute-walking-distance (6MWD) will be determined according the American Thoracic Society published guidelines of 2002(16). Individuals should walk at their own pace, can stop if necessary, and are allowed to use oxygen. Body composition will be estimated using single frequency (50 kHz) bioelectrical impedance (Biostat 500), and fat-free-mass will be calculated with the disease-specific equation of Schols et al(17).

## Immunological outcomes

### *Lung inflammation*

- Sputum will be induced and processed according to a validated and standardized technique(18), with some modifications. Differential cell counts of eosinophils, neutrophils, lymphocytes, macrophages, epithelial and squamous cells will be performed on May Grünwald Giemsa (MGG) stained cytopins by a qualified cytopathologist.
- Exhaled breath condensate (EBC) will be collected using The EcoScreen® (Jaeger, Hoechberg, Germany). Hydrogen peroxide, pH, 8-isoprostane, nitrite, nitrate, 4-hydroxy-2-nonenal and malondialdehyde will be measured.
- Bronchoscopy will be performed using established guidelines(19-21), and 6 bronchial biopsies will be taken from subsegmental carinae in the right or left lower lobe. Epithelial morphology, epithelial proliferation, and basement membrane thickness will be measured(22). Submucosal density of inflammatory cells (AA1, EG2, CD68, CD3, CD4, CD4CD25, CD8, mast cells, neutrophils) will be quantitated in a semi-automated way(22). Expression of E-Cadherin, VEGF, ICAM, VCAM, E-selection, P-selectin, AGEs and RAGEs will be measured.
- Epithelial lining fluid will be sampled by advancing 3 microsample probes (BC -401C, Olympus, Tokyo, Japan) in the lumen of the left main bronchus (23,24). Cytokines will be measured by Luminex (Linco, Nuclilab BV, Ede, The Netherlands). 90% of the ELF will be used for proteomic analysis. Briefly, each trypsin digested sample will be labeled (iTRAQ® Reagent 8-plex, ABSciex, Foster City, CA, USA) according to the manufacturer's protocol. The individually labeled digests will be combined into a single sample mixture and subjected to strong-cation exchange chromatography (AKTA Purifier, GE Healthcare Biosciences AB, Uppsala, Sweden). The resulting peptide-containing fractions will be separated by reversed-phase chromatography (Ultimate 3000 nanoflow liquid chromatography system, Dionex, Amsterdam, The Netherlands). Fractions of 12 sec will be spotted on MALDI targets (Probot, Dionex, Amsterdam, The Netherlands) and mass spectrometric analysis will be carried out on a 4800 Proteomics Analyzer MALDI

1  
2  
3 TOF/TOF instrument (Applied Biosystems, Foster City, CA, USA) controlled by the 4000  
4 Series Explorer v3.5 software. Proteins will be identified using Protein Pilot® software  
5 v2.0 (Applied Biosystems).  
6  
7

- 8  
9 • Bronchial epithelial cells will be harvested from the right or left main bronchus by  
10 brushing as described elsewhere(25). Brushed epithelial cells will be cultured to enable  
11 corticosteroid sensitivity experiments. In these experiments, cultured bronchial epithelial  
12 cells will be incubated *in vitro* with steroids and the effects on chemokine production (IL-  
13 8, GRO-a, RANTES) and MMP/TIMP expression (mRNA) will be established. In addition,  
14 in peripheral blood mononuclear cells (PBMC) the following parameters will be studied: 1)  
15 plasma levels of chemokines/inflammatory cytokines 2) *In vitro* effects of steroids on  
16 TNF- $\alpha$ , IL-1 $\alpha$ , IL-10, TGF- $\beta$ , signaling pathways (western/EMSA), TLRs and CD14  
17 expression as well as genes with a GRE in their promoter, e.g.  $\beta$ -adrenergic receptor,  
18 MAPKP-1, FoxP3 (ELISA/RTPCR).  
19  
20  
21  
22  
23  
24  
25  
26  
27  
28  
29  
30

### 31 *Systemic inflammation*

32 Systemic inflammation will be measured in peripheral blood using several methods to study  
33 systemic activation of innate immune cells at three four different levels:  
34  
35  
36

- 37 • Expression of established and newly markers on innate immune cells associated with  
38 pre-activation(26,27). The established markers include proteins that are up-regulated on  
39 the cell surface upon activation of neutrophils *in vitro*, and can be measured by  
40 flowcytometry: CD11b (Mac-1), CD18 (integrin  $\beta$ 2 chain), CD66b (CAECAM-8), CD63  
41 (LAMP-3). New markers directed against active integrins and Fc-receptors have been  
42 shown useful in detecting more subtle activation such as induced by cytokines: active  
43 Mac-1 (CD11b/clone CBRM1/5 (28)), active  $\beta$ 1-integrin chain (CD29/ clone N29 (29)),  
44 and active Fc $\gamma$ RII (CD32/clones A17 (30)). These latter markers will be used to detect  
45 subtle priming signals affecting the function of leukocytes in the peripheral blood.  
46  
47  
48  
49  
50  
51  
52  
53  
54  
55  
56  
57  
58  
59  
60

- Determination of the sensitivity of innate immune cells for stimuli. One of the first changes which can be observed in response to inflammatory stimuli *in vivo* is a change in sensitivity for innate immune stimuli such as fMLF. Little activation is associated with an enhanced responsiveness, whereas pronounced systemic activation is associated with decreased responsiveness for fMLF (31)). Therefore, the responsiveness of leukocytes for fMLF will be measured as read-out for systemic inflammatory signals *in vivo*.
- Genomic and proteomic analysis of innate immune cells *in vivo* (32). Total mRNA and proteins are collected from leukocytes and will be analysed by unsupervised genomic and proteomics techniques. Proteomics will be carried out by 2D-DIGE (33).
- Multiplex analysis of the presence of pro-and anti-inflammatory cytokines in plasma/serum. Serum samples will be analysed for the presence of multiple cytokines and chemokines by luminex technology (34).

Systemic inflammation will also be measured in peripheral blood using peripheral blood mononuclear cells (PBMC's):

- Expression of intracellular and cell-surface markers of adaptive immune cells (Th1-cells, Th2-cells, Th17-cells, T<sub>reg</sub>-cells, B-cells, NK-cells) will be measured by flow cytometry.

#### *Lung and systemic inflammation after acute smoking*

Young and old subjects who are susceptible or not susceptible to develop COPD will smoke 3 cigarettes in 1 hour. Exhaled CO, Bblood samples, and urine, exhaled breath condensate, bronchial biopsies, epithelial lining fluid and epithelial brushes will be collected at baseline and after smoking according the scheme in table 3. Exhaled CO will be measured at baseline to check if individuals did not smoke recently, and after smoking to check if individuals inhaled cigarette smoke sufficiently. A first bronchoscopy will be performed after 24 hours. Bronchial biopsies, epithelial brushes and microprobe sampling of epithelial lining fluid will be collected. Six weeks after the acute smoking procedure a second bronchoscopy will be performed as a baseline measurement, obtaining the same specimen.

Sputum supernatant, epithelial cells, serum, plasma, DNA, and RNA of blood will be stored for further analyses.

**Table 3 Acute smoke model**

|                           | Baseline | Smoking<br>3 cigarettes | 5<br>minutes | 2<br>hours | 24<br>hours | 6<br>weeks |
|---------------------------|----------|-------------------------|--------------|------------|-------------|------------|
| Exhaled CO                | x        |                         | x            | x          | x           | x          |
| Blood                     | x        |                         |              | x          |             |            |
| Exhaled breath condensate | x        |                         | x            | x          |             |            |
| Urine                     | x        |                         |              | x          | x           |            |
| Bronchial Biopsies        |          |                         |              |            | x           | x          |
| Epithelial brush          |          |                         |              |            | x           | x          |
| Microsampling probe (ELF) |          |                         |              |            | x           | x          |

Samples collected at baseline and during the acute smoking procedure including sputum supernatant, serum, plasma, DNA and RNA of blood, urine, exhaled breath condensate, epithelial lining fluid, epithelial brushes, and bronchial biopsies will be stored for further analyses.

### **Radiological outcomes**

All subjects will undergo a low-dose CT-scan at full inspiration and expiration. Exposure settings will be 30 mAs at 90 kVp for patients weighing less than 50 kg, 30 mAs at 120 kVp for patients weighing between 50 and 80 kg and 30 mAs at 140 kVp for those weighing more than 80 kg without dose modulation. During expiration the exposure settings will be 20 mAs at 90 kVp (body mass < 80kg) or 20 mAs at 120 kVp (body mass > 80kg). Emphysematous lung changes will be quantitated using automated software on low-dose CT scanning images developed in the UMC Utrecht.

### Sample size calculation

We concluded that the limited data in the literature do not allow to calculate a reliable sample size according to a formal power-analysis. In general 20-30 subjects per group are needed in studies to detect a significant pro- or anti-inflammatory effect in sputum, BAL or bronchial biopsies. Looking to the available acute smoking studies in the literature this seems sufficient to detect an effect at least in exhaled breath condensate.

### Statistical analyses

Demographic variables as age, sex, smoking habits, education, work, other exposures, height and weight will be expressed as means (SD) or medians (IQR) as appropriate for continuous variables, and number (percentages) for dichotomous variables, according to group. Exacerbation frequency will be described (with percentage) per groups. Spirometry data (FEV<sub>1</sub>, FEV<sub>1</sub>/FVC, IVC, FEF<sub>50</sub>, FEF<sub>75</sub>, reversibility to salbutamol, TLCO TLC, FRC (body box), CO diffusion, methacholine challenge tests), and data indicative of systemic inflammation will be described likewise.

Comparisons between groups with regard to all of the above mentioned variables will be tested using Chi-square tests in case of comparison of proportions, and parametric (like the unpaired t-test) or non-parametric tests (like the M-W-U-test/ Wilcoxon rank sum) as appropriate according to the distribution of the residuals. To test changes within groups over time at various visits, additionally paired variants of the before mentioned tests will be used as appropriate (for example, the paired-t-test and the Wilcoxon signed rank test).

Linear or logistic regression will be used to further analyze differences between groups in the above mentioned outcome variables taking confounding factors into account. Techniques like Linear Mixed Effects models will be used to estimate changes in variables over time.

### Ethics and dissemination

1  
2  
3 The two studies are registered at clinicaltrial.gov (identifier study 1: NCT00807469 and  
4 identifier study 2: NCT 00850863). These two studies have been judged by the medical  
5 ethical committee of UMC Groningen and additionally study 2 has been minimally judged by  
6 the medical ethical committee of UMC Utrecht. The study findings will be presented at  
7 conferences and will be reported in peer-reviewed journals.  
8  
9  
10  
11  
12  
13  
14  
15  
16  
17  
18  
19  
20  
21  
22  
23  
24  
25  
26  
27  
28  
29  
30  
31  
32  
33  
34  
35  
36  
37  
38  
39  
40  
41  
42  
43  
44  
45  
46  
47  
48  
49  
50  
51  
52  
53  
54  
55  
56  
57  
58  
59  
60

## DISCUSSION

There is a large backlog in the recognition of different phenotypes of COPD and their underlying immunopathological processes. This importantly hinders the appropriate diagnosis, treatment and prognosis of this debilitating disease. Currently lung function (FEV<sub>1</sub> and FEV<sub>1</sub>/FVC) is still the standard for the diagnosis and classification of COPD(1). However, there is general consensus that FEV<sub>1</sub> poorly correlates with important patient-centred outcomes such as quality of life, symptoms and exercise capacity(35). Celli et al showed an association between FEV<sub>1</sub> and mortality when FEV<sub>1</sub> was combined with MRC-dyspnoea score, 6-minute walking distance and BMI. The so-called BODE index was put forward as a composite measure to characterise COPD in a more realistic way(4). In the last decades different approaches have been put forward to characterize COPD leading to at least 16 different phenotypes(36). Although clinically relevant in terms of presentation, triggers and treatment response these phenotypes do not necessarily give insight into the underlying disease processes of COPD. In this perspective the term intermediate phenotype or endotype has been put forward to describe a subtype of a disease which is defined by a distinct functional or pathophysiological mechanism(37). Together with genetic and environmental factors intermediate phenotypes may explain the clinical presentation of a heterogeneous disease like COPD. Accordingly, the present study will phenotype the induction and progression of COPD and associate this with underlying pathophysiological mechanisms in a biased as well as non-biased way. As smoking is the most important environmental risk factor for COPD we will use an acute smoking model to evaluate differences in smoking-induced acute mechanisms differentially expressed between individuals with a high and low risk for development of COPD.

Recently, a large prospective cohort study (ECLIPSE) was initiated to study the natural course of COPD in order to gain more insight in the underlying pathogenetic mechanisms(38). The ECLIPSE study is a three year observational study including current and ex-smoking COPD patients and healthy controls with and without a smoking history.



1  
2  
3 Indeed the ECLIPSE study confirmed that the clinical manifestations of COPD are highly  
4  
5 variable and that the degree of airflow limitation does not capture the heterogeneity of the  
6  
7 disease(39). Particularly, the rate of change in FEV<sub>1</sub> among patients with COPD was highly  
8  
9 variable, with increased rates of decline among current smokers, patients with bronchodilator  
10  
11 reversibility and with emphysema(40). Several new susceptibility genes have been identified  
12  
13 in the ECLIPSE study(41,42), as well as potentially useful biomarkers(43-45). However, in  
14  
15 contrast to our study ECLIPSE does not include young subjects and is, therefore, not able to  
16  
17 investigate the susceptibility for COPD at young age. ECLIPSE investigates aspects of  
18  
19 systemic inflammation (CRP, TNF- $\alpha$ , IL-6, IL-8, SDP), but does not investigate the activation  
20  
21 state of circulating neutrophils and lymphocytes, nor does it perform unbiased proteomic  
22  
23 analyses of epithelial lining fluid and peripheral blood neutrophils. Therefore, our study will  
24  
25 complement ECLIPSE data by focusing on the pathogenesis of local and systemic  
26  
27 inflammation by using unique approaches to link genomic and inflammatory phenotypes in all  
28  
29 stages of COPD from preclinical to advanced disease.  
30

31  
32 The present study has already been started and recruitment is still ongoing. The study  
33  
34 population has been described in ClinicalTrial.gov (NCT00807469, NCT 00850863) and was  
35  
36 divided into 9 groups. Initially, we planned to distinguish susceptible individuals into a  
37  
38 “susceptible” and “very susceptible” group. The group of “old” very susceptible individuals  
39  
40 should include early-onset COPD (FEV<sub>1</sub>/FVC<70%, FEV<sub>1</sub>< 40% predicted, age<53 years)  
41  
42 and COPD with low number of pack years (FEV<sub>1</sub>/FVC < 70%, FEV<sub>1</sub> < 80%predicted, pack  
43  
44 years<5). The group of “young” very susceptible individuals should have included young  
45  
46 individuals with family members with early-onset COPD or COPD with low smoke exposure.  
47  
48 Despite an intensive search among lung transplantation (LTx) candidates/recipients and their  
49  
50 family members we were not able to recruit this group in sufficiently high numbers.  
51  
52 Therefore, we decided to combine the susceptible and very susceptible groups.  
53  
54  
55  
56  
57  
58  
59  
60

1  
2  
3 COPD is often accompanied by different co-morbidities, especially cardiovascular conditions,  
4  
5 which also affect the prognosis of the disease as well as quality of life and cost of  
6  
7 COPD(46,47). Consequently, we do not exclude subjects with cardiovascular co-morbidity  
8  
9 conditions unless the condition was acute or too severe. We use the selected grade 1-3 co-  
10  
11 morbidity list in the ACE-27(9) to exclude patients with co-morbidities within grade 2 or 3 in  
12  
13 all organ systems except the respiratory system. We also exclude subjects with systemic  
14  
15 inflammatory diseases such as rheumatoid arthritis, because we might investigate systemic  
16  
17 inflammation related to other systemic inflammatory diseases.  
18  
19

20  
21 In conclusion this study will provide valuable information regarding the pathogenetic  
22  
23 mechanisms underlying the development of COPD, which in the future will help us to develop  
24  
25 new targets for the management of different phenotypes of COPD.  
26  
27  
28  
29  
30  
31  
32  
33  
34  
35  
36  
37  
38  
39  
40  
41  
42  
43  
44  
45  
46  
47  
48  
49  
50  
51  
52  
53  
54  
55  
56  
57  
58  
59  
60

## Funding

This research was done in the framework of the Top Institute Pharma project T1-108 "Acute and chronic inflammatory responses-COPD and smoking", with partners University Medical Center Groningen (UMCG), University of Groningen (RUG), GRIAC research institute Groningen, University Medical Center Utrecht (UMCU), Nycomed BV, GlaxoSmithKline, and Foundation TI Pharma. The corticosteroid sensitivity part of study 1 was also done in the framework of the Top Institute Pharma project T1-201 "COPD, transition of systemic inflammation into multiorgan pathology", with partners University Medical Center Groningen, University Medical Center Utrecht, University Medical Center Maastricht, Nycomed BV, GlaxoSmithKline, Danone, AstraZeneca, and Foundation TI Pharma.

## Competing Interests

AT, SH, LF, RB, RH, IH, AO, MB, JW, and LK have no competing interests to declare. WT has received payment for lectures from Chiesi, GSK, and Roche diagnostics. DP has received an unrestricted educational grant for research from AstraZeneca and Chiesi; fees for consultancies by DP were given to the University of Groningen by AZ, Boehringer Ingelheim, Chiesi, GSK, Nycomed and TEVA; NH received grants from GlaxoSmithKline, Boehringer Ingelheim, Nycomed and Chiesi.

## Authors' contributions

NH, JW, DSP, LK, RB, AO, WT, and MB participated in the design and supervision of the study. ALT and SH were involved in the patient-related investigations and contributed equally to the manuscript. LF performed the proteomic analyses of epithelial lining fluid. RH investigated in vitro corticosteroid sensitivity of epithelial cells. All authors read and approved the final manuscript.

## REFERENCES

- (1) Global initiative for Chronic Obstructive Lung Disease. Global strategy for the diagnosis, management, and prevention of chronic obstructive pulmonary disease. 2010; Available at: [http://www.goldcopd.org/uploads/users/files/GOLDReport\\_April112011.pdf](http://www.goldcopd.org/uploads/users/files/GOLDReport_April112011.pdf).
- (2) Joos L, Pare PD, Sandford AJ. Genetic risk factors of chronic obstructive pulmonary disease. *Swiss Med Wkly* 2002 Jan 26;132(3-4):27-37.
- (3) Friedlander AL, Lynch D, Dyar LA, Bowler RP. Phenotypes of chronic obstructive pulmonary disease. *COPD* 2007 Dec;4(4):355-384.
- (4) Celli BR, Cote CG, Marin JM, Casanova C, Montes de Oca M, Mendez RA, et al. The body-mass index, airflow obstruction, dyspnea, and exercise capacity index in chronic obstructive pulmonary disease. *N Engl J Med* 2004 Mar 4;350(10):1005-1012.
- (5) van der Vaart H, Postma DS, Timens W, ten Hacken NH. Acute effects of cigarette smoke on inflammation and oxidative stress: a review. *Thorax* 2004 Aug;59(8):713-721.
- (6) Lapperre TS, Snoeck-Stroband JB, Gosman MM, Jansen DF, van Schadewijk A, Thiadens HA, et al. Effect of fluticasone with and without salmeterol on pulmonary outcomes in chronic obstructive pulmonary disease: a randomized trial. *Ann Intern Med* 2009 Oct 20;151(8):517-527.
- (7) Culpitt SV, Rogers DF, Shah P, De Matos C, Russell RE, Donnelly LE, et al. Impaired inhibition by dexamethasone of cytokine release by alveolar macrophages from patients with chronic obstructive pulmonary disease. *Am J Respir Crit Care Med* 2003 Jan 1;167(1):24-31.
- (8) Russell RE, Culpitt SV, DeMatos C, Donnelly L, Smith M, Wiggins J, et al. Release and activity of matrix metalloproteinase-9 and tissue inhibitor of metalloproteinase-1 by alveolar macrophages from patients with chronic obstructive pulmonary disease. *Am J Respir Cell Mol Biol* 2002 May;26(5):602-609.
- (9) Paleri V, Wight RG. Applicability of the adult comorbidity evaluation - 27 and the Charlson indexes to assess comorbidity by notes extraction in a cohort of United Kingdom patients with head and neck cancer: a retrospective study. *J Laryngol Otol* 2002 Mar;116(3):200-205.
- (10) Vink JM, Willemsen G, Beem AL, Boomsma DI. The Fagerstrom Test for Nicotine Dependence in a Dutch sample of daily smokers and ex-smokers. *Addict Behav* 2005 Mar;30(3):575-579.
- (11) Wendel-Vos GC, Schuit AJ, Saris WH, Kromhout D. Reproducibility and relative validity of the short questionnaire to assess health-enhancing physical activity. *J Clin Epidemiol* 2003 Dec;56(12):1163-1169.
- (12) Jones PW, Quirk FH, Baveystock CM. The St George's Respiratory Questionnaire. *Respir Med* 1991 Sep;85 Suppl B:25-31; discussion 33-7.
- (13) Livingston E, Chaudhuri R, McMahon AD, Fraser I, McSharry CP, Thomson NC. Systemic sensitivity to corticosteroids in smokers with asthma. *Eur Respir J* 2007 Jan;29(1):64-71.

- 1  
2  
3 (14) Meerwaldt R, Graaff R, Oomen PH, Links TP, Jager JJ, Alderson NL, et al. Simple non-  
4 invasive assessment of advanced glycation endproduct accumulation. *Diabetologia* 2004  
5 Jul;47(7):1324-1330.  
6
- 7 (15) Miller MR, Hankinson J, Brusasco V, Burgos F, Casaburi R, Coates A, et al.  
8 Standardisation of spirometry. *Eur Respir J* 2005 Aug;26(2):319-338.  
9
- 10 (16) ATS Committee on Proficiency Standards for Clinical Pulmonary Function Laboratories.  
11 ATS statement: guidelines for the six-minute walk test. *Am J Respir Crit Care Med* 2002 Jul  
12 1;166(1):111-117.  
13
- 14 (17) Baarends EM, van Marken Lichtenbelt WD, Wouters EF, Schols AM. Body-water  
15 compartments measured by bio-electrical impedance spectroscopy in patients with chronic  
16 obstructive pulmonary disease. *Clin Nutr* 1998 Feb;17(1):15-22.  
17
- 18 (18) Snoeck-Stroband JB, Lapperre TS, Gosman MM, Boezen HM, Timens W, ten Hacken  
19 NH, et al. Chronic bronchitis sub-phenotype within COPD: inflammation in sputum and  
20 biopsies. *Eur Respir J* 2008 Jan;31(1):70-77.  
21
- 22 (19) Workshop summary and guidelines: investigative use of bronchoscopy, lavage, and  
23 bronchial biopsies in asthma and other airway diseases. *J Allergy Clin Immunol* 1991  
24 Nov;88(5):808-814.  
25
- 26 (20) Hattotuwa K, Gamble EA, O'Shaughnessy T, Jeffery PK, Barnes NC. Safety of  
27 bronchoscopy, biopsy, and BAL in research patients with COPD. *Chest* 2002  
28 Dec;122(6):1909-1912.  
29
- 30 (21) British Thoracic Society Bronchoscopy Guidelines Committee, a Subcommittee of  
31 Standards of Care Committee of British Thoracic Society. British Thoracic Society guidelines  
32 on diagnostic flexible bronchoscopy. *Thorax* 2001 Mar;56 Suppl 1:i1-21.  
33
- 34 (22) Broekema M, ten Hacken NH, Volbeda F, Lodewijk ME, Hylkema MN, Postma DS, et al.  
35 Airway epithelial changes in smokers but not in ex-smokers with asthma. *Am J Respir Crit*  
36 *Care Med* 2009 Dec 15;180(12):1170-1178.  
37
- 38 (23) Komaki Y, Sugiura H, Koarai A, Tomaki M, Ogawa H, Akita T, et al. Cytokine-mediated  
39 xanthine oxidase upregulation in chronic obstructive pulmonary disease's airways. *Pulm*  
40 *Pharmacol Ther* 2005;18(4):297-302.  
41
- 42 (24) Ishizaka A, Watanabe M, Yamashita T, Ogawa Y, Koh H, Hasegawa N, et al. New  
43 bronchoscopic microsample probe to measure the biochemical constituents in epithelial  
44 lining fluid of patients with acute respiratory distress syndrome. *Crit Care Med* 2001  
45 Apr;29(4):896-898.  
46
- 47 (25) Kelsen SG, Mardini IA, Zhou S, Benovic JL, Higgins NC. A technique to harvest viable  
48 tracheobronchial epithelial cells from living human donors. *Am J Respir Cell Mol Biol* 1992  
49 Jul;7(1):66-72.  
50
- 51 (26) Luijk B, Lindemans CA, Kanters D, van der Heijde R, Bertics P, Lammers JW, et al.  
52 Gradual increase in priming of human eosinophils during extravasation from peripheral blood  
53 to the airways in response to allergen challenge. *J Allergy Clin Immunol* 2005  
54 May;115(5):997-1003.  
55  
56  
57  
58  
59  
60

1  
2  
3 (27) Koenderman L, Kanters D, Maesen B, Raaijmakers J, Lammers JW, de Kruif J, et al.  
4 Monitoring of neutrophil priming in whole blood by antibodies isolated from a synthetic phage  
5 antibody library. *J Leukoc Biol* 2000 Jul;68(1):58-64.  
6

7 (28) Diamond MS, Springer TA. A subpopulation of Mac-1 (CD11b/CD18) molecules  
8 mediates neutrophil adhesion to ICAM-1 and fibrinogen. *J Cell Biol* 1993 Jan;120(2):545-  
9 556.  
10

11 (29) Johansson MW, Kelly EA, Busse WW, Jarjour NN, Mosher DF. Up-regulation and  
12 activation of eosinophil integrins in blood and airway after segmental lung antigen challenge.  
13 *J Immunol* 2008 Jun 1;180(11):7622-7635.  
14

15 (30) Kanters D, ten Hove W, Luijk B, van Aalst C, Schweizer RC, Lammers JW, et al.  
16 Expression of activated Fc gamma RII discriminates between multiple granulocyte-priming  
17 phenotypes in peripheral blood of allergic asthmatic subjects. *J Allergy Clin Immunol* 2007  
18 Nov;120(5):1073-1081.  
19

20 (31) Pillay J, Hietbrink F, Koenderman L, Leenen LP. The systemic inflammatory response  
21 induced by trauma is reflected by multiple phenotypes of blood neutrophils. *Injury* 2007  
22 Dec;38(12):1365-1372.  
23

24 (32) Oudijk EJ, Lo Tam Loi AT, Langereis JD, Ulfman LH, Koenderman L. Functional  
25 antagonism by GM-CSF on TNF-alpha-induced CD83 expression in human neutrophils. *Mol*  
26 *Immunol* 2008 Nov;46(1):91-96.  
27

28 (33) Langereis JD, Franciosi L, Ulfman LH, Koenderman L. GM-CSF and TNFalpha  
29 modulate protein expression of human neutrophils visualized by fluorescence two-  
30 dimensional difference gel electrophoresis. *Cytokine* 2011 Nov;56(2):422-429.  
31

32 (34) de Jager W, te Velthuis H, Prakken BJ, Kuis W, Rijkers GT. Simultaneous detection of  
33 15 human cytokines in a single sample of stimulated peripheral blood mononuclear cells. *Clin*  
34 *Diagn Lab Immunol* 2003 Jan;10(1):133-139.  
35

36 (35) Huijsmans RJ, de Haan A, ten Hacken NN, Straver RV, van't Hul AJ. The clinical utility  
37 of the GOLD classification of COPD disease severity in pulmonary rehabilitation. *Respir Med*  
38 2008 Jan;102(1):162-171.  
39

40 (36) O'Neil SE, Lundback B, Lotvall J. Proteomics in asthma and COPD phenotypes and  
41 endotypes for biomarker discovery and improved understanding of disease entities. *J*  
42 *Proteomics* 2011 Dec 10;75(1):192-201.  
43

44 (37) Anderson GP. Endotyping asthma: new insights into key pathogenic mechanisms in a  
45 complex, heterogeneous disease. *Lancet* 2008 Sep 20;372(9643):1107-1119.  
46

47 (38) Vestbo J, Anderson W, Coxson HO, Crim C, Dawber F, Edwards L, et al. Evaluation of  
48 COPD Longitudinally to Identify Predictive Surrogate End-points (ECLIPSE). *Eur Respir J*  
49 2008 Apr;31(4):869-873.  
50

51 (39) Agusti A, Calverley PM, Celli B, Coxson HO, Edwards LD, Lomas DA, et al.  
52 Characterisation of COPD heterogeneity in the ECLIPSE cohort. *Respir Res* 2010 Sep  
53 10;11:122.  
54  
55  
56  
57  
58  
59  
60

- 1  
2  
3 (40) Vestbo J, Edwards LD, Scanlon PD, Yates JC, Agusti A, Bakke P, et al. Changes in  
4 forced expiratory volume in 1 second over time in COPD. *N Engl J Med* 2011 Sep  
5 29;365(13):1184-1192.  
6
- 7 (41) Qiu W, Cho MH, Riley JH, Anderson WH, Singh D, Bakke P, et al. Genetics of sputum  
8 gene expression in chronic obstructive pulmonary disease. *PLoS One* 2011;6(9):e24395.  
9
- 10 (42) Castaldi PJ, Cho MH, Litonjua AA, Bakke P, Gulsvik A, Lomas DA, et al. The  
11 Association of Genome-Wide Significant Spirometric Loci with Chronic Obstructive  
12 Pulmonary Disease Susceptibility. *Am J Respir Cell Mol Biol* 2011 Dec;45(6):1147-1153.  
13
- 14 (43) Lomas DA, Silverman EK, Edwards LD, Locantore NW, Miller BE, Horstman DH, et al.  
15 Serum surfactant protein D is steroid sensitive and associated with exacerbations of COPD.  
16 *Eur Respir J* 2009 Jul;34(1):95-102.  
17
- 18 (44) Sin DD, Miller BE, Duvoix A, Man SF, Zhang X, Silverman EK, et al. Serum PARC/CCL-  
19 18 concentrations and health outcomes in chronic obstructive pulmonary disease. *Am J*  
20 *Respir Crit Care Med* 2011 May 1;183(9):1187-1192.  
21
- 22 (45) Pillai SG, Kong X, Edwards LD, Cho MH, Anderson WH, Coxson HO, et al. Loci  
23 identified by genome-wide association studies influence different disease-related phenotypes  
24 in chronic obstructive pulmonary disease. *Am J Respir Crit Care Med* 2010 Dec  
25 15;182(12):1498-1505.  
26
- 27 (46) Sin DD, Anthonisen NR, Soriano JB, Agusti AG. Mortality in COPD: Role of  
28 comorbidities. *Eur Respir J* 2006 Dec;28(6):1245-1257.  
29
- 30 (47) Anthonisen NR, Skeans MA, Wise RA, Manfreda J, Kanner RE, Connett JE, et al. The  
31 effects of a smoking cessation intervention on 14.5-year mortality: a randomized clinical trial.  
32 *Ann Intern Med* 2005 Feb 15;142(4):233-239.  
33  
34  
35  
36  
37  
38  
39  
40  
41  
42  
43  
44  
45  
46  
47  
48  
49  
50  
51  
52  
53  
54  
55  
56  
57  
58  
59  
60

1  
2  
3 **Figure 1 Acute smoking effects in the lung**  
4  
5

6  
7 **Figure 2 General hypothesis about the role of systemic inflammation**  
8  
9  
10  
11  
12  
13  
14  
15  
16  
17  
18  
19  
20  
21  
22  
23  
24  
25  
26  
27  
28  
29  
30  
31  
32  
33  
34  
35  
36  
37  
38  
39  
40  
41  
42  
43  
44  
45  
46  
47  
48  
49  
50  
51  
52  
53  
54  
55  
56  
57  
58  
59  
60

For peer review only



1  
2  
3 **Acute and chronic inflammatory responses induced by smoking in individuals being**  
4 **susceptible and non-susceptible for development of COPD: from specific disease**  
5 **phenotyping towards novel therapy: protocol of a cross-sectional study**  
6  
7

8  
9 *Short title: Acute and chronic smoking effects and susceptibility to COPD*  
10

11  
12 Adèle T Lo Tam Loi<sup>1</sup>, Susan JM Hoonhorst<sup>2,6</sup>, Lorenza Franciosi<sup>3,6</sup>, Rainer Bischoff<sup>3,6</sup>, Roland  
13 F Hoffmann<sup>4,6</sup>, Irene Heijink<sup>4,6</sup>, Antoon JM van Oosterhout<sup>4,6</sup>, H. Marike Boezen<sup>5,6</sup>, Wim  
14 Timens<sup>4,6</sup>, Dirkje S Postma<sup>2,6</sup>, Jan-Willem Lammers<sup>1</sup>, Leo Koenderman<sup>1</sup>, Nick HT ten  
15 Hacken<sup>2,6</sup>  
16  
17

18  
19  
20 <sup>1</sup> *Department of Respiratory Medicine, University Medical Center Utrecht, the Netherlands*

21 <sup>2</sup> *Department of Pulmonary Disease, University of Groningen, University Medical Center*  
22 *Groningen, the Netherlands*  
23

24 <sup>3</sup> *Department of Pharmacy, Analytical Biochemistry, University of Groningen, the Netherlands*

25 <sup>4</sup> *Department of Pathology & Medical Biology, University of Groningen, University Medical*  
26 *Center Groningen, the Netherlands*  
27

28 <sup>5</sup> *Department of Epidemiology, University of Groningen, University Medical Center Groningen,*  
29 *the Netherlands*  
30

31 <sup>6</sup> *GRIAC research institute, University of Groningen, the Netherlands*  
32  
33

34  
35 **Corresponding author:**

36 Dr. N.H.T. ten Hacken  
37  
38 Dept. of Pulmonary diseases  
39  
40 University Medical Center Groningen  
41  
42 Hanzeplein 1  
43  
44 9713 GZ Groningen  
45  
46 The Netherlands  
47  
48 phone: +31-50-3614574  
49  
50 Fax: +31-50-3619320  
51  
52 n.h.t.ten.hacken@umcg.nl

53 **Keywords**

54 COPD, Inflammation, Susceptibility, Corticosteroid insensitivity, Smoking  
55

56 **Word count** 3733  
57  
58  
59  
60

**ABSTRACT***(Word count = 300)*

**Introduction:** Chronic obstructive pulmonary disease (COPD) is a heterogeneous disease with pulmonary and extra-pulmonary manifestations. Although COPD is a complex disease, the diagnosis and staging are still based on simple spirometry measurements. Different COPD phenotypes exist based on clinical, physiological, immunological, and radiological observations. Cigarette smoking is the most important risk factor for COPD, but only 15-20% of smokers develop the disease, suggesting a genetic predisposition. Unfortunately, little is known about the pathogenesis of COPD, and even less on the very first steps that are associated with an aberrant response to smoke exposure.

This study aims to investigate the underlying local and systemic inflammation of different clinical COPD phenotypes, and acute effects of cigarette smoke exposure in individuals susceptible and non-susceptible for the development of COPD. Furthermore, we will investigate mechanisms associated with corticosteroid insensitivity. Our study will provide valuable information regarding the pathogenetic mechanisms underlying the natural course of COPD.

**Methods and analysis:** This cross-sectional study will include young and old individuals susceptible or non-susceptible to develop COPD. At young age (18-40 years) 60 “party smokers” will be included that are called susceptible or non-susceptible based on COPD prevalence in smoking family members. Additionally, 30 healthy smokers (age 40-75 years) and 110 COPD patients will be included. Measurements will include questionnaires, pulmonary function, low-dose CT scanning of the lung, body composition, 6-min-walking distance, and biomarkers in peripheral blood, sputum, urine, exhaled breath condensate, epithelial lining fluid, bronchial brushes and biopsies. Non-biased approaches such as proteomics will be performed in blood and epithelial lining fluid.

**Ethics and dissemination:** This multicenter study was approved by the medical ethical committees of UMC Groningen and Utrecht, the Netherlands. The study findings will be presented at conferences and will be reported in peer-reviewed journals.

**Trial registration:** ClinicalTrials.gov, NCT00807469 (study 1) and NCT00850863 (study 2).

## ARTICLE SUMMARY

### Article focus

This article describes the study protocol of a cross-sectional study investigating the underlying local and systemic inflammation of different clinical COPD phenotypes, and acute effects of cigarette smoke exposure in individuals susceptible and non-susceptible for the development of COPD.

### Key messages

- Young (18-40) and older (40-75) individuals who are susceptible and non-susceptible to develop COPD are included.
- All groups are extensively phenotyped by clinical, physiological, immunological, and radiographical characterisation. Furthermore, effects of acute smoking are studied.

### Strengths and limitations of the study

- Extensive characterisation of a well defined study population, providing valuable information regarding the pathogenic mechanisms underlying the natural cause of COPD.
- Recruitment of a population with high and low familiar risk to develop COPD.

## BACKGROUND

Chronic obstructive pulmonary disease (COPD) is a major cause of morbidity and mortality worldwide(1). The disease is characterized by persistent and progressive expiratory airflow obstruction (post-bronchodilator  $FEV_1/FVC < 0.70$ ) and its severity is based on  $FEV_1$  %predicted(1). Cigarette smoking is the most important risk factor for COPD in the western world, but only 15-20 % of young smokers will eventually develop the disease, suggesting a genetic predisposition. So far, the genetic background of these susceptible smokers has not been elucidated(2). Unravelling the underlying pathogenetic mechanisms of COPD is difficult because it takes 20-30 years of smoking before susceptible smokers develop established COPD. Also, there is the problem that COPD has many clinical expressions, and we just have started to learn how to phenotype this heterogeneous disease. Finally, there are many other risk factors that may modulate the complex interaction between the genetic background and smoking, like *in utero* events, microbial infections, dietary factors, physical inactivity and pharmacological treatment.

It is well accepted that the spirometry measurements ( $FEV_1$  and FVC) are largely insufficient to diagnose and classify COPD(1). With the increased recognition of the various clinical expressions of COPD, consensus is growing that COPD represents a spectrum of overlapping diseases with important extra-pulmonary consequences. Phenotypes of COPD may be classified according to four domains: clinical, physiological, immunological and radiographical(3).

- Clinical distinctions are generally based on dyspnea scores, frequency of exacerbations, body mass, muscle wasting, corticosteroid responsiveness, depression / anxiety, co-morbidity, and healthy status(4).
- Physiological distinctions may be based on the degree of airflow limitation, decline in lung function, bronchodilator responsiveness, airway hyperresponsiveness, CO diffusion capacity, hyperinflation, body-plethysmography, bio-impedance, and exercise tolerance.

- Immunological features comprise the type and severity of local and systemic immunological processes in the lung and systemic compartment. In blood leukocytes cytokines, and mediators may affect the functionality of extra-pulmonary tissues and organs, leading to COPD-associated co-morbid conditions.
- Radiographic distinctions may be based on the presence of various forms and severity of emphysema, thickened large airways, and small airways abnormality on high-resolution computed tomography scans.

Although systemic inflammation and multi-organ pathology have been put forward as important features of COPD, surprisingly little is known about the underlying pathogenesis. Most COPD studies in this field included small numbers of individuals, focused on more severe stages of COPD, characterized subjects clinically on the basis of few arbitrary pulmonary measurements, did not take into account the genetic background and paid limited attention to different aspects of systemic inflammation. In addition, most studies assumed that assessment of cytokines by multiplex assays (e.g. Luminex) is sufficient to accurately describe the systemic inflammatory response. Unfortunately, many caveats are present that preclude a complete insight in this response, e.g.:

- not all cytokines implicated in COPD are known,
- little effort is taken to measure anti-inflammatory cytokines (the balance between pro- and anti-inflammatory signals will probably determine the extent and type of inflammation),
- different pro-inflammatory cytokines can act as heterologous antagonists (inhibit the effects of other cytokines).
- the kinetics of cytokines is very dynamic and no consensus is present regarding an optimal single time point for blood collection.

In the present study we set out to characterize systemic inflammation by an alternative approach. Innate immune cells will be used as integrators of pro- and anti-inflammatory

1  
2  
3 signals. We hypothesize that subtle changes in the phenotype of granulocytes and  
4  
5 monocytes are caused by an “inflammatory imprinting” of these cells.  
6  
7

8  
9 Cigarette smoking is the main risk factor for developing COPD. Repetitive acute effects of  
10  
11 cigarette smoke exposure may accumulate and after many years lead to irreversible lung  
12  
13 damage. To understand the changes in the lung due to chronic smoking we believe that it is  
14  
15 important to first investigate the exact immunological responses to an acute smoke exposure  
16  
17 event, particularly in “naive” lungs that are not yet affected by chronic smoke exposure. The  
18  
19 acute (<24 hours) effects of smoking in humans, animals and cell cultures have been  
20  
21 extensively reviewed some years ago by van der Vaart and colleagues(5). If we integrate all  
22  
23 available data on acute smoking we are able to construct a hypothetical time frame for the  
24  
25 acute effects of smoking (figure 1). One of the very first insults on the bronchial system is by  
26  
27 oxidants present in cigarette smoke. After local depletion of anti-oxidants, the first oxidative  
28  
29 stress products can be measured within 1 hour. These products will disappear within 6  
30  
31 hours. There is a surprisingly fast influx of inflammatory cells; even faster than the synthesis  
32  
33 of some pro-inflammatory cytokines (TNF-alpha, IL-1beta, IL-8). The exact time period at  
34  
35 which the proteinase / antiproteinase balance is affected is unknown; however, protein  
36  
37 degradation is measurable within 6 hours after smoking. Unfortunately, until now, only a few  
38  
39 studies have investigated the acute effects of cigarette smoking in humans(5). These studies  
40  
41 included only small numbers of individuals, characterized subjects mainly on basis of  
42  
43 pulmonary measurements, paid no attention to the genetic background and paid limited  
44  
45 attention to different aspects of pulmonary inflammation.  
46  
47

48  
49 Corticosteroids provide little therapeutic benefit in a relatively large group of COPD patients,  
50  
51 despite their broad anti-inflammatory effects. Our goal is to identify common markers in  
52  
53 peripheral blood monocytes, skin and lung epithelial cells that might contribute to  
54  
55 corticosteroid insensitivity. Recently, the GLUCOLD study demonstrated beneficial effects on  
56  
57 airway wall inflammation and decline in lung function yet with large inter-individual  
58  
59  
60

1  
2  
3 differences(6). *In vitro* studies have shown that the ability of dexamethasone to suppress  
4 cytokine release (e.g. IL-8) from alveolar macrophages is impaired in COPD patients as  
5 compared to healthy smokers(7). Furthermore, alveolar macrophages from healthy smokers  
6 are more resistant to corticosteroids than macrophages from non-smokers(8). This relative  
7 steroid insensitivity may, in part, be explained by a suppressive effect of cigarette smoke-  
8 induced oxidative stress. This suppression may particularly play a role in the airway  
9 epithelium, where cells are in first contact with cigarette smoke and form an important source  
10 of mediators involved in the induction of neutrophilic airway inflammation (e.g. the  
11 chemoattractant IL-8). It may well be that corticosteroid insensitivity is gradually acquired by  
12 smoking in COPD, and one might hypothesize that smokers who develop COPD are more  
13 prone to have signs of corticosteroid insensitivity.  
14  
15  
16  
17  
18  
19  
20  
21  
22  
23  
24  
25  
26

### 27 **General hypotheses**

28  
29 There is a clear need to better understand all factors that contribute to the development of  
30 COPD and its different phenotypes. This study focuses on the pathogenesis and clinical  
31 expression of smoking-induced COPD, studied both in the pulmonary and the systemic  
32 compartments. The following general hypothesis is put forward by our consortium (figure 2):  
33  
34  
35  
36  
37  
38

39 *“COPD is a multi-organ disease situated in both the lung and extra-pulmonary organs and*  
40 *tissues. Dysfunction of the latter tissues is exemplified by muscle atrophy, impaired muscle*  
41 *oxidative capacity, osteoporosis, atherosclerosis and heart failure. A low-grade systemic*  
42 *inflammation plays a pivotal role in the induction and perpetuation of this multi-organ*  
43 *disease. Smoking and persistent production of inflammatory mediators from the lung are*  
44 *inducers of systemic inflammation. Other risk factors such as diet deficiencies, sedentary life*  
45 *style, and frequent infections contribute independently to further amplification of systemic*  
46 *inflammation. In more advanced COPD the extra-pulmonary pathology starts to contribute to*  
47 *disease severity and a vicious circle of persistent difficulty to treat inflammation.*  
48 *Consequently, local and systemic inflammation should be reduced in all stages of disease by*  
49  
50  
51  
52  
53  
54  
55  
56  
57  
58  
59  
60

1  
2  
3 reversing negative life style factors and applying successful anti-inflammatory treatment  
4 modalities. In more advanced stages multimodal interventions additionally should improve  
5 impaired tissue functions. An important contributing problem is the relative corticosteroid  
6 insensitivity of both lung and peripheral tissue responses in COPD.”  
7  
8  
9

### 10 11 12 13 **Aims of the study**

- 14  
15 • To assess systemic and local inflammation at baseline in:
  - 16  
17 a) young healthy individuals with low number of pack years smoking who have a  
18 high and low familial risk to develop COPD;
  - 19  
20 b) older individuals with higher number of pack years who either have normal lung  
21 function or COPD.  
22  
23
- 24  
25 We hypothesize that young susceptible individuals and COPD patients demonstrate a  
26 higher degree and different type of local and systemic inflammation at baseline.  
27
- 28  
29 • To study systemic and local inflammation after acute smoke exposure in the above  
30 groups. We hypothesize that young susceptible individuals and COPD patients  
31 demonstrate a higher and aberrant local and systemic inflammatory response to cigarette  
32 smoke.  
33  
34
- 35  
36 • To compare in bronchial epithelial cells and PBMCs corticosteroid responsiveness *in vitro*  
37 between susceptible and non-susceptible individuals. To study in these cells the effects  
38 of cigarette smoking and to elucidate underlying mechanisms of corticosteroid  
39 unresponsiveness.  
40  
41
- 42  
43 • To determine whether the type and severity of the systemic inflammatory response contributes  
44 to the clinical outcome of COPD. We hypothesize that the type and severity of systemic  
45 inflammation have profound effects on the clinical picture of COPD.  
46  
47
- 48  
49 • To investigate the relationship between downstream genetic effects (transcriptome, proteome)  
50 and specific COPD phenotypes in peripheral blood and lung tissue (induced sputum, bronchial  
51 biopsies, epithelial lining fluid).  
52  
53  
54  
55  
56  
57  
58  
59  
60



## METHODS

### Study population

In total 200 old and young individuals who are susceptible or not susceptible to develop COPD will be recruited (table 1). At old age (>40 years), 30 healthy smokers (>20 pack years) and 110 COPD patients (>10 pack years) will be enrolled in the study. At young age, 60 “party smokers” with a normal lung function will be included with a high or low prevalence of COPD in smoking family members (see table 1). Party smoking was defined by irregularly smoking and/or able to quit smoking for at least two days. Exclusion criteria are:  $\alpha$ -1-anti-trypsin-deficiency, acute pulmonary infections (like tuberculosis, pneumonia, flue, tracheo-bronchitis), prior history of significant inflammatory lung disease other than COPD (sarcoidosis, pulmonary fibrosis, silicosis, ect.), active infections (such as hepatitis A-C, cystitis, gastro-enteritis etc.), treatment with antibiotics or corticosteroids within 8 weeks, taking part in another study, recent diagnosis of cancer. Medication such as NSAIDs and immunosuppressive agents which could affect the results of the study will be excluded, as well as substance abuse. Co-morbidities that might lead to study-related (serious) adverse events will be excluded on basis of an arbitrary selection of conditions listed in the ACE-27 co-morbidity scale(9).

**Table 1 Study population**

| Disease                | No | Age (Yrs)     | Smoking status | Pack years | FEV <sub>1</sub> /VC, % | FEV <sub>1</sub> , % pred |
|------------------------|----|---------------|----------------|------------|-------------------------|---------------------------|
| <i>Non-susceptible</i> |    |               |                |            |                         |                           |
| Healthy [A]            | 30 | 18-40         | Party smoking  | 0-10       | > 70                    | > 85                      |
| Healthy [B]            | 30 | 40-75         | Ex or current  | >20        | > 70                    | > 85                      |
| <i>Susceptible</i>     |    |               |                |            |                         |                           |
| Healthy [C]            | 30 | 18-40         | Party smoking  | 0-10       | > 70                    | > 85                      |
| COPD                   |    |               |                |            |                         |                           |
| Stage I [D1]           | 30 | 40-75         | Ex or current  | >10        | ≤ 70                    | > 80                      |
| Stage II [D2]          | 30 | 40-75         |                | >10        | ≤ 70                    | 50-80                     |
| Stage III [D3]         | 30 | 40-75         |                | >10        | ≤ 70                    | 30-50                     |
| Stage IV [D4]*         | 20 | 40-75<br>< 53 |                | >10        | ≤ 70                    | < 30<br>< 30%             |

*Susceptibility in young individuals is based on family history. Not susceptible means that none of the smoking family members who are at least 40 years of age have COPD. Susceptible means that the prevalence of COPD in smoking family members older than 40 years is high: 2 out of 2, 2 out of 3 or 3 out of 3, 3 out of 4 or 4 out of 4. Party smoking was defined by irregularly smoking and/or able to quit smoking for at least two days. Alpha-1-antitrypsin deficiency is excluded. \*patients with a FEV<sub>1</sub> 30-50% predicted in combination with chronic respiratory failure also have stage IV.*

### Study design

This study is a bi-center cross-sectional study that takes place at the University Medical Centers Utrecht (UMC Utrecht) and Groningen (UMC Groningen). Participating subjects will undergo extensive clinical characterisation (table 2). Local and systemic inflammation will be investigated in several ways. Special attention will be paid to acute smoking and corticosteroid insensitivity in selected subgroups.

Table 2 Measurements

|                       | Measurements                                 | Group      |
|-----------------------|----------------------------------------------|------------|
| <b>Clinical</b>       | Demographics                                 | All        |
|                       | Physical examination                         | All        |
|                       | Peripheral blood (routine measurements)      | All        |
|                       | Presence of metabolic syndrome               | All        |
|                       | ECG                                          | B, D1-4    |
|                       | Bode index                                   | B, D1-4    |
|                       | Fagerstrom Smoking Questionnaire             | All        |
|                       | St Georges Respiratory Questionnaire (SGRQ)  | D1-4       |
|                       | Clinical COPD Questionnaire (CCQ)            | D1-4       |
|                       | SQUASH                                       | All        |
|                       | Urine (microproteins)                        | All        |
|                       | AGE (Advanced Glycation Endproducts)-reader  | All        |
|                       | Skin blanching test                          | All        |
| <b>Physiological</b>  | Flow volume + reversibility                  | All        |
|                       | Body plethysmography                         | All        |
|                       | CO diffusion                                 | All        |
|                       | Methacholine challenge test                  | A,B,C,D1-3 |
|                       | Bioelectrical impedance                      | All        |
|                       | Six minute walking distance                  | B,D1-4     |
| <b>Immunological</b>  | Sputum induction (only baseline)             | A,B,C,D2   |
|                       | Peripheral blood (systemic inflammation)     | All        |
|                       | Peripheral blood 4x (acute smoking)          | A,B,C,D2   |
|                       | Exhaled breath condensate 3x (acute smoking) | A,B,C,D2   |
|                       | Exhaled CO 5x (acute smoking)                | A,B,C,D2   |
|                       | Bronchial biopsy 2x (acute smoking)          | A,B,C,D2   |
|                       | Epithelial lining fluid 2x (acute smoking)   | A,B,C,D2   |
|                       | Epithelial brushes 2x (acute smoking)        | A,B,C,D2   |
| <b>Radiographical</b> | Low dose HRCT-scan lung                      | All        |

### Clinical outcomes

Demographic variables include: age, sex, smoking habits, education, profession, other exposures, height and weight. Risk factors of the metabolic syndrome will be determined including blood pressure, waist hip circumference, lipid profile and fasting glucose (table 2). Questionnaires will be the Clinical COPD Questionnaire (CCQ), the St Georges Respiratory Questionnaire (SGRQ), the Dutch Fagerstrom test for nicotine dependence, and the Short QUestionnaire to ASsess Health-enhancing physical activity (SQUASH)(10-12). Exacerbation frequency will be recorded in COPD patients. The BODE-index will be calculated on basis of FEV<sub>1</sub>, six-minute-walking distance, Body Mass Index (BMI) and MRC-dyspnea score(4). In urine (micro) protein concentration will be assessed. Corticosteroid sensitivity will be measured by the cutaneous vasoconstrictor response to topical budesonide using the skin blanching test(13). Budesonide dissolved in 95% ethanol will be applied to the skin using eight different concentrations (0-1000 µg/ml). Blanching will be scored with a 7-point scale: 0-3 (increasing with steps of 0.5; 0 = no blanching and 3 = intense blanching). Cumulative oxidative stress will be measured in the skin using the non-invasive AGE (Advanced Glycation Endproducts) reader (DiagnOptics, Groningen, The Netherlands)(14).

### Physiological outcomes

Spirometry will be performed according to international guidelines (ERS 2005)(15). We will assess FEV<sub>1</sub>, FEV<sub>1</sub>/FVC, IVC, FEF50, FEF75, reversibility to salbutamol, TLC, FRC (body box), and CO diffusion. Methacholine challenge tests are performed according to international guidelines (ERS 2005), using serial doubling concentrations of methacholine-bromide (0.03 to 38.4 mg/ml) with the 2-min tidal breathing method at 5-minute intervals. The six-minute-walking-distance (6MWD) will be determined according the American Thoracic Society published guidelines of 2002(16). Individuals should walk at their own pace, can stop if necessary, and are allowed to use oxygen. Body composition will be estimated using single frequency (50 kHz) bioelectrical impedance (Biostat 500), and fat-free-mass will be calculated with the disease-specific equation of Schols et al(17).

## Immunological outcomes

### *Lung inflammation*

- Sputum will be induced and processed according to a validated and standardized technique(18), with some modifications. Differential cell counts of eosinophils, neutrophils, lymphocytes, macrophages, epithelial and squamous cells will be performed on May Grünwald Giemsa (MGG) stained cytopins by a qualified cytopathologist.
- Exhaled breath condensate (EBC) will be collected using The EcoScreen® (Jaeger, Hoechberg, Germany). Hydrogen peroxide, pH, 8-isoprostane, nitrite, nitrate, 4-hydroxy-2-nonenal and malondialdehyde will be measured.
- Bronchoscopy will be performed using established guidelines(19-21), and 6 bronchial biopsies will be taken from subsegmental carinae in the right or left lower lobe. Epithelial morphology, epithelial proliferation, and basement membrane thickness will be measured(22). Submucosal density of inflammatory cells (AA1, EG2, CD68, CD3, CD4, CD4CD25, CD8, mast cells, neutrophils) will be quantitated in a semi-automated way(22). Expression of E-Cadherin, VEGF, ICAM, VCAM, E-selection, P-selectin, AGEs and RAGEs will be measured.
- Epithelial lining fluid will be sampled by advancing 3 microsample probes (BC -401C, Olympus, Tokyo, Japan) in the lumen of the left main bronchus (23,24). Cytokines will be measured by Luminex (Linco, Nuclilab BV, Ede, The Netherlands). 90% of the ELF will be used for proteomic analysis. Briefly, each trypsin digested sample will be labeled (iTRAQ® Reagent 8-plex, ABSciex, Foster City, CA, USA) according to the manufacturer's protocol. The individually labeled digests will be combined into a single sample mixture and subjected to strong-cation exchange chromatography (AKTA Purifier, GE Healthcare Biosciences AB, Uppsala, Sweden). The resulting peptide-containing fractions will be separated by reversed-phase chromatography (Ultimate 3000 nanoflow liquid chromatography system, Dionex, Amsterdam, The Netherlands). Fractions of 12 sec will be spotted on MALDI targets (Probot, Dionex, Amsterdam, The Netherlands) and mass spectrometric analysis will be carried out on a 4800 Proteomics Analyzer MALDI

1  
2  
3 TOF/TOF instrument (Applied Biosystems, Foster City, CA, USA) controlled by the 4000  
4 Series Explorer v3.5 software. Proteins will be identified using Protein Pilot® software  
5 v2.0 (Applied Biosystems).  
6  
7

- 8  
9 • Bronchial epithelial cells will be harvested from the right or left main bronchus by  
10 brushing as described elsewhere(25). Brushed epithelial cells will be cultured to enable  
11 corticosteroid sensitivity experiments. In these experiments, cultured bronchial epithelial  
12 cells will be incubated *in vitro* with steroids and the effects on chemokine production (IL-  
13 8, GRO- $\alpha$ , RANTES) and MMP/TIMP expression (mRNA) will be established. In addition,  
14 in peripheral blood mononuclear cells (PBMC) the following parameters will be studied: 1)  
15 plasma levels of chemokines/inflammatory cytokines 2) *In vitro* effects of steroids on  
16 TNF- $\alpha$ , IL-1 $\alpha$ , IL-10, TGF- $\beta$ , signaling pathways (western/EMSA), TLRs and CD14  
17 expression as well as genes with a GRE in their promoter, e.g.  $\beta$ -adrenergic receptor,  
18 MAPKP-1, FoxP3 (ELISA/RTPCR).  
19  
20  
21  
22  
23  
24  
25  
26  
27  
28  
29  
30

### 31 *Systemic inflammation*

32 Systemic inflammation will be measured in peripheral blood using several methods to study  
33 systemic activation of innate immune cells at ~~three~~ four different levels:  
34  
35  
36

- 37 • Expression of established and newly markers on innate immune cells associated with  
38 pre-activation(26,27). The established markers include proteins that are up-regulated on  
39 the cell surface upon activation of neutrophils *in vitro*, and can be measured by  
40 flowcytometry: CD11b (Mac-1), CD18 (integrin  $\beta$ 2 chain), CD66b (CAECAM-8), CD63  
41 (LAMP-3). New markers directed against active integrins and Fc-receptors have been  
42 shown useful in detecting more subtle activation such as induced by cytokines: active  
43 Mac-1 (CD11b/clone CBRM1/5 (28)), active  $\beta$ 1-integrin chain (CD29/ clone N29 (29)),  
44 and active Fc $\gamma$ RII (CD32/clones A17 (30)). These latter markers will be used to detect  
45 subtle priming signals affecting the function of leukocytes in the peripheral blood.  
46  
47  
48  
49  
50  
51  
52  
53  
54  
55  
56  
57  
58  
59  
60

- Determination of the sensitivity of innate immune cells for stimuli. One of the first changes which can be observed in response to inflammatory stimuli *in vivo* is a change in sensitivity for innate immune stimuli such as fMLF. Little activation is associated with an enhanced responsiveness, whereas pronounced systemic activation is associated with decreased responsiveness for fMLF (31)). Therefore, the responsiveness of leukocytes for fMLF will be measured as read-out for systemic inflammatory signals *in vivo*.
- Genomic and proteomic analysis of innate immune cells *in vivo* (32). Total mRNA and proteins are collected from leukocytes and will be analysed by unsupervised genomic and proteomics techniques. Proteomics will be carried out by 2D-DIGE (33).
- Multiplex analysis of the presence of pro-and anti-inflammatory cytokines in plasma/serum. Serum samples will be analysed for the presence of multiple cytokines and chemokines by luminex technology (34).

Systemic inflammation will also be measured in peripheral blood using peripheral blood mononuclear cells (PBMC's):

- Expression of intracellular and cell-surface markers of adaptive immune cells (Th1-cells, Th2-cells, Th17-cells, T<sub>reg</sub>-cells, B-cells, NK-cells) will be measured by flow cytometry.

#### *Lung and systemic inflammation after acute smoking*

Young and old subjects who are susceptible or not susceptible to develop COPD will smoke 3 cigarettes in 1 hour. Exhaled CO, blood samples, and urine, ~~exhaled breath condensate, bronchial biopsies, epithelial lining fluid and epithelial brushes~~ will be collected at baseline and after smoking according the scheme in table 3. Exhaled CO will be measured at baseline to check if individuals did not smoke recently, and after smoking to check if individuals inhaled cigarette smoke sufficiently. A first bronchoscopy will be performed after 24 hours. Bronchial biopsies, epithelial brushes and microprobe sampling of epithelial lining fluid will be collected. Six weeks after the acute smoking procedure a second bronchoscopy will be performed as a baseline measurement, obtaining the same specimen.

~~Sputum supernatant, epithelial cells, serum, plasma, DNA, and RNA of blood will be stored for further analyses.~~

**Table 3 Acute smoke model**

|                           | Baseline | Smoking<br>3 cigarettes | 5<br>minutes | 2<br>hours | 24<br>hours | 6<br>weeks |
|---------------------------|----------|-------------------------|--------------|------------|-------------|------------|
| Exhaled CO                | x        |                         | x            | x          | x           | x          |
| Blood                     | x        |                         |              | x          |             |            |
| Exhaled breath condensate | x        |                         | x            | x          |             |            |
| Urine                     | x        |                         |              | x          | x           |            |
| Bronchial Biopsies        |          |                         |              |            | x           | x          |
| Epithelial brush          |          |                         |              |            | x           | x          |
| Microsampling probe (ELF) |          |                         |              |            | x           | x          |

Samples collected at baseline and during the acute smoking procedure including sputum supernatant, serum, plasma, DNA and RNA of blood, urine, exhaled breath condensate, epithelial lining fluid, epithelial brushes, and bronchial biopsies will be stored for further analyses.

### Radiological outcomes

All subjects will undergo a low-dose CT-scan at full inspiration and expiration. Exposure settings will be 30 mAs at 90 kVp for patients weighing less than 50 kg, 30 mAs at 120 kVp for patients weighing between 50 and 80 kg and 30 mAs at 140 kVp for those weighing more than 80 kg without dose modulation. During expiration the exposure settings will be 20 mAs at 90 kVp (body mass < 80kg) or 20 mAs at 120 kVp (body mass > 80kg). Emphysematous lung changes will be quantitated using automated software on low-dose CT scanning images developed in the UMC Utrecht.



### Sample size calculation

We concluded that the limited data in the literature do not allow to calculate a reliable sample size according to a formal power-analysis. In general 20-30 subjects per group are needed in studies to detect a significant pro- or anti-inflammatory effect in sputum, BAL or bronchial biopsies. Looking to the available acute smoking studies in the literature this seems sufficient to detect an effect at least in exhaled breath condensate.

### Statistical analyses

Demographic variables as age, sex, smoking habits, education, work, other exposures, height and weight will be expressed as means (SD) or medians (IQR) as appropriate for continuous variables, and number (percentages) for dichotomous variables, according to group. Exacerbation frequency will be described (with percentage) per groups. Spirometry data (FEV<sub>1</sub>, FEV<sub>1</sub>/FVC, IVC, FEF<sub>50</sub>, FEF<sub>75</sub>, reversibility to salbutamol, TLCO TLC, FRC (body box), CO diffusion, methacholine challenge tests), and data indicative of systemic inflammation will be described likewise.

Comparisons between groups with regard to all of the above mentioned variables will be tested using Chi-square tests in case of comparison of proportions, and parametric (like the unpaired t-test) or non-parametric tests (like the M-W-U-test/ Wilcoxon rank sum) as appropriate according to the distribution of the residuals. To test changes within groups over time at various visits, additionally paired variants of the before mentioned tests will be used as appropriate (for example, the paired-t-test and the Wilcoxon signed rank test).

Linear or logistic regression will be used to further analyze differences between groups in the above mentioned outcome variables taking confounding factors into account. Techniques like Linear Mixed Effects models will be used to estimate changes in variables over time.

### Ethics and dissemination

1  
2  
3 The two studies are registered at clinicaltrial.gov (identifier study 1: NCT00807469 and  
4 identifier study 2: NCT 00850863). These two studies have been judged by the medical  
5 ethical committee of UMC Groningen and additionally study 2 has been minimally judged by  
6 the medical ethical committee of UMC Utrecht. The study findings will be presented at  
7 conferences and will be reported in peer-reviewed journals.  
8  
9  
10  
11  
12  
13  
14  
15  
16  
17  
18  
19  
20  
21  
22  
23  
24  
25  
26  
27  
28  
29  
30  
31  
32  
33  
34  
35  
36  
37  
38  
39  
40  
41  
42  
43  
44  
45  
46  
47  
48  
49  
50  
51  
52  
53  
54  
55  
56  
57  
58  
59  
60

## DISCUSSION

There is a large backlog in the recognition of different phenotypes of COPD and their underlying immunopathological processes. This importantly hinders the appropriate diagnosis, treatment and prognosis of this debilitating disease. Currently lung function (FEV<sub>1</sub> and FEV<sub>1</sub>/FVC) is still the standard for the diagnosis and classification of COPD(1). However, there is general consensus that FEV<sub>1</sub> poorly correlates with important patient-centred outcomes such as quality of life, symptoms and exercise capacity(35). Celli et al showed an association between FEV<sub>1</sub> and mortality when FEV<sub>1</sub> was combined with MRC-dyspnoea score, 6-minute walking distance and BMI. The so-called BODE index was put forward as a composite measure to characterise COPD in a more realistic way(4). In the last decades different approaches have been put forward to characterize COPD leading to at least 16 different phenotypes(36). Although clinically relevant in terms of presentation, triggers and treatment response these phenotypes do not necessarily give insight into the underlying disease processes of COPD. In this perspective the term intermediate phenotype or endotype has been put forward to describe a subtype of a disease which is defined by a distinct functional or pathophysiological mechanism(37). Together with genetic and environmental factors intermediate phenotypes may explain the clinical presentation of a heterogeneous disease like COPD. Accordingly, the present study will phenotype the induction and progression of COPD and associate this with underlying pathophysiological mechanisms in a biased as well as non-biased way. As smoking is the most important environmental risk factor for COPD we will use an acute smoking model to evaluate differences in smoking-induced acute mechanisms differentially expressed between individuals with a high and low risk for development of COPD.

Recently, a large prospective cohort study (ECLIPSE) was initiated to study the natural course of COPD in order to gain more insight in the underlying pathogenetic mechanisms(38). The ECLIPSE study is a three year observational study including current and ex-smoking COPD patients and healthy controls with and without a smoking history.

1  
2  
3 Indeed the ECLIPSE study confirmed that the clinical manifestations of COPD are highly  
4  
5 variable and that the degree of airflow limitation does not capture the heterogeneity of the  
6  
7 disease(39). Particularly, the rate of change in FEV<sub>1</sub> among patients with COPD was highly  
8  
9 variable, with increased rates of decline among current smokers, patients with bronchodilator  
10  
11 reversibility and with emphysema(40). Several new susceptibility genes have been identified  
12  
13 in the ECLIPSE study(41,42), as well as potentially useful biomarkers(43-45). However, in  
14  
15 contrast to our study ECLIPSE does not include young subjects and is, therefore, not able to  
16  
17 investigate the susceptibility for COPD at young age. ECLIPSE investigates aspects of  
18  
19 systemic inflammation (CRP, TNF- $\alpha$ , IL-6, IL-8, SDP), but does not investigate the activation  
20  
21 state of circulating neutrophils and lymphocytes, nor does it perform unbiased proteomic  
22  
23 analyses of epithelial lining fluid and peripheral blood neutrophils. Therefore, our study will  
24  
25 complement ECLIPSE data by focusing on the pathogenesis of local and systemic  
26  
27 inflammation by using unique approaches to link genomic and inflammatory phenotypes in all  
28  
29 stages of COPD from preclinical to advanced disease.  
30

31  
32 The present study has already been started and recruitment is still ongoing. The study  
33  
34 population has been described in ClinicalTrial.gov (NCT00807469, NCT 00850863) and was  
35  
36 divided into 9 groups. Initially, we planned to distinguish susceptible individuals into a  
37  
38 “susceptible” and “very susceptible” group. The group of “old” very susceptible individuals  
39  
40 should include early-onset COPD (FEV<sub>1</sub>/FVC<70%, FEV<sub>1</sub>< 40% predicted, age<53 years)  
41  
42 and COPD with low number of pack years (FEV<sub>1</sub>/FVC < 70%, FEV<sub>1</sub> < 80%predicted, pack  
43  
44 years<5). The group of “young” very susceptible individuals should have included young  
45  
46 individuals with family members with early-onset COPD or COPD with low smoke exposure.  
47  
48 Despite an intensive search among lung transplantation (LTx) candidates/recipients and their  
49  
50 family members we were not able to recruit this group in sufficiently high numbers.  
51  
52 Therefore, we decided to combine the susceptible and very susceptible groups.  
53  
54  
55  
56  
57  
58  
59  
60

1  
2  
3 COPD is often accompanied by different co-morbidities, especially cardiovascular conditions,  
4  
5 which also affect the prognosis of the disease as well as quality of life and cost of  
6  
7 COPD(46,47). Consequently, we do not exclude subjects with cardiovascular co-morbidity  
8  
9 conditions unless the condition was acute or too severe. We use the selected grade 1-3 co-  
10  
11 morbidity list in the ACE-27(9) to exclude patients with co-morbidities within grade 2 or 3 in  
12  
13 all organ systems except the respiratory system. We also exclude subjects with systemic  
14  
15 inflammatory diseases such as rheumatoid arthritis, because we might investigate systemic  
16  
17 inflammation related to other systemic inflammatory diseases.  
18  
19

20  
21 In conclusion this study will provide valuable information regarding the pathogenetic  
22  
23 mechanisms underlying the development of COPD, which in the future will help us to develop  
24  
25 new targets for the management of different phenotypes of COPD.  
26  
27  
28  
29  
30  
31  
32  
33  
34  
35  
36  
37  
38  
39  
40  
41  
42  
43  
44  
45  
46  
47  
48  
49  
50  
51  
52  
53  
54  
55  
56  
57  
58  
59  
60

## Funding

This research was done in the framework of the Top Institute Pharma project T1-108 "Acute and chronic inflammatory responses-COPD and smoking", with partners University Medical Center Groningen (UMCG), University of Groningen (RUG), GRIAC research institute Groningen, University Medical Center Utrecht (UMCU), Nycomed BV, GlaxoSmithKline, and Foundation TI Pharma. The corticosteroid sensitivity part of study 1 was also done in the framework of the Top Institute Pharma project T1-201 "COPD, transition of systemic inflammation into multiorgan pathology", with partners University Medical Center Groningen, University Medical Center Utrecht, University Medical Center Maastricht, Nycomed BV, GlaxoSmithKline, Danone, AstraZeneca, and Foundation TI Pharma.

## Competing Interests

AT, SH, LF, RB, RH, IH, AO, MB, JW, and LK have no competing interests to declare. WT has received payment for lectures from Chiesi, GSK, and Roche diagnostics. DP has received an unrestricted educational grant for research from AstraZeneca and Chiesi; fees for consultancies by DP were given to the University of Groningen by AZ, Boehringer Ingelheim, Chiesi, GSK, Nycomed and TEVA; NH received grants from GlaxoSmithKline, Boehringer Ingelheim, Nycomed and Chiesi.

## Authors' contributions

NH, JW, DSP, LK, RB, AO, WT, and MB participated in the design and supervision of the study. ALT and SH were involved in the patient-related investigations and contributed equally to the manuscript. LF performed the proteomic analyses of epithelial lining fluid. RH investigated in vitro corticosteroid sensitivity of epithelial cells. All authors read and approved the final manuscript.

## REFERENCES

- (1) Global initiative for Chronic Obstructive Lung Disease. Global strategy for the diagnosis, management, and prevention of chronic obstructive pulmonary disease. 2010; Available at: [http://www.goldcopd.org/uploads/users/files/GOLDReport\\_April112011.pdf](http://www.goldcopd.org/uploads/users/files/GOLDReport_April112011.pdf).
- (2) Joos L, Pare PD, Sandford AJ. Genetic risk factors of chronic obstructive pulmonary disease. *Swiss Med Wkly* 2002 Jan 26;132(3-4):27-37.
- (3) Friedlander AL, Lynch D, Dyar LA, Bowler RP. Phenotypes of chronic obstructive pulmonary disease. *COPD* 2007 Dec;4(4):355-384.
- (4) Celli BR, Cote CG, Marin JM, Casanova C, Montes de Oca M, Mendez RA, et al. The body-mass index, airflow obstruction, dyspnea, and exercise capacity index in chronic obstructive pulmonary disease. *N Engl J Med* 2004 Mar 4;350(10):1005-1012.
- (5) van der Vaart H, Postma DS, Timens W, ten Hacken NH. Acute effects of cigarette smoke on inflammation and oxidative stress: a review. *Thorax* 2004 Aug;59(8):713-721.
- (6) Lapperre TS, Snoeck-Stroband JB, Gosman MM, Jansen DF, van Schadewijk A, Thiadens HA, et al. Effect of fluticasone with and without salmeterol on pulmonary outcomes in chronic obstructive pulmonary disease: a randomized trial. *Ann Intern Med* 2009 Oct 20;151(8):517-527.
- (7) Culpitt SV, Rogers DF, Shah P, De Matos C, Russell RE, Donnelly LE, et al. Impaired inhibition by dexamethasone of cytokine release by alveolar macrophages from patients with chronic obstructive pulmonary disease. *Am J Respir Crit Care Med* 2003 Jan 1;167(1):24-31.
- (8) Russell RE, Culpitt SV, DeMatos C, Donnelly L, Smith M, Wiggins J, et al. Release and activity of matrix metalloproteinase-9 and tissue inhibitor of metalloproteinase-1 by alveolar macrophages from patients with chronic obstructive pulmonary disease. *Am J Respir Cell Mol Biol* 2002 May;26(5):602-609.
- (9) Paleri V, Wight RG. Applicability of the adult comorbidity evaluation - 27 and the Charlson indexes to assess comorbidity by notes extraction in a cohort of United Kingdom patients with head and neck cancer: a retrospective study. *J Laryngol Otol* 2002 Mar;116(3):200-205.
- (10) Vink JM, Willemsen G, Beem AL, Boomsma DI. The Fagerstrom Test for Nicotine Dependence in a Dutch sample of daily smokers and ex-smokers. *Addict Behav* 2005 Mar;30(3):575-579.
- (11) Wendel-Vos GC, Schuit AJ, Saris WH, Kromhout D. Reproducibility and relative validity of the short questionnaire to assess health-enhancing physical activity. *J Clin Epidemiol* 2003 Dec;56(12):1163-1169.
- (12) Jones PW, Quirk FH, Baveystock CM. The St George's Respiratory Questionnaire. *Respir Med* 1991 Sep;85 Suppl B:25-31; discussion 33-7.
- (13) Livingston E, Chaudhuri R, McMahon AD, Fraser I, McSharry CP, Thomson NC. Systemic sensitivity to corticosteroids in smokers with asthma. *Eur Respir J* 2007 Jan;29(1):64-71.

1  
2  
3 (14) Meerwaldt R, Graaff R, Oomen PH, Links TP, Jager JJ, Alderson NL, et al. Simple non-  
4 invasive assessment of advanced glycation endproduct accumulation. *Diabetologia* 2004  
5 Jul;47(7):1324-1330.

6  
7 (15) Miller MR, Hankinson J, Brusasco V, Burgos F, Casaburi R, Coates A, et al.  
8 Standardisation of spirometry. *Eur Respir J* 2005 Aug;26(2):319-338.

9  
10 (16) ATS Committee on Proficiency Standards for Clinical Pulmonary Function Laboratories.  
11 ATS statement: guidelines for the six-minute walk test. *Am J Respir Crit Care Med* 2002 Jul  
12 1;166(1):111-117.

13  
14 (17) Baarends EM, van Marken Lichtenbelt WD, Wouters EF, Schols AM. Body-water  
15 compartments measured by bio-electrical impedance spectroscopy in patients with chronic  
16 obstructive pulmonary disease. *Clin Nutr* 1998 Feb;17(1):15-22.

17  
18 (18) Snoeck-Stroband JB, Lapperre TS, Gosman MM, Boezen HM, Timens W, ten Hacken  
19 NH, et al. Chronic bronchitis sub-phenotype within COPD: inflammation in sputum and  
20 biopsies. *Eur Respir J* 2008 Jan;31(1):70-77.

21  
22 (19) Workshop summary and guidelines: investigative use of bronchoscopy, lavage, and  
23 bronchial biopsies in asthma and other airway diseases. *J Allergy Clin Immunol* 1991  
24 Nov;88(5):808-814.

25  
26 (20) Hattotuwa K, Gamble EA, O'Shaughnessy T, Jeffery PK, Barnes NC. Safety of  
27 bronchoscopy, biopsy, and BAL in research patients with COPD. *Chest* 2002  
28 Dec;122(6):1909-1912.

29  
30 (21) British Thoracic Society Bronchoscopy Guidelines Committee, a Subcommittee of  
31 Standards of Care Committee of British Thoracic Society. British Thoracic Society guidelines  
32 on diagnostic flexible bronchoscopy. *Thorax* 2001 Mar;56 Suppl 1:i1-21.

33  
34 (22) Broekema M, ten Hacken NH, Volbeda F, Lodewijk ME, Hylkema MN, Postma DS, et al.  
35 Airway epithelial changes in smokers but not in ex-smokers with asthma. *Am J Respir Crit*  
36 *Care Med* 2009 Dec 15;180(12):1170-1178.

37  
38 (23) Komaki Y, Sugiura H, Koarai A, Tomaki M, Ogawa H, Akita T, et al. Cytokine-mediated  
39 xanthine oxidase upregulation in chronic obstructive pulmonary disease's airways. *Pulm*  
40 *Pharmacol Ther* 2005;18(4):297-302.

41  
42 (24) Ishizaka A, Watanabe M, Yamashita T, Ogawa Y, Koh H, Hasegawa N, et al. New  
43 bronchoscopic microsample probe to measure the biochemical constituents in epithelial  
44 lining fluid of patients with acute respiratory distress syndrome. *Crit Care Med* 2001  
45 Apr;29(4):896-898.

46  
47 (25) Kelsen SG, Mardini IA, Zhou S, Benovic JL, Higgins NC. A technique to harvest viable  
48 tracheobronchial epithelial cells from living human donors. *Am J Respir Cell Mol Biol* 1992  
49 Jul;7(1):66-72.

50  
51 (26) Luijk B, Lindemans CA, Kanters D, van der Heijde R, Bertics P, Lammers JW, et al.  
52 Gradual increase in priming of human eosinophils during extravasation from peripheral blood  
53 to the airways in response to allergen challenge. *J Allergy Clin Immunol* 2005  
54 May;115(5):997-1003.



- 1  
2  
3 (27) Koenderman L, Kanters D, Maesen B, Raaijmakers J, Lammers JW, de Kruif J, et al.  
4 Monitoring of neutrophil priming in whole blood by antibodies isolated from a synthetic phage  
5 antibody library. *J Leukoc Biol* 2000 Jul;68(1):58-64.  
6
- 7 (28) Diamond MS, Springer TA. A subpopulation of Mac-1 (CD11b/CD18) molecules  
8 mediates neutrophil adhesion to ICAM-1 and fibrinogen. *J Cell Biol* 1993 Jan;120(2):545-  
9 556.  
10
- 11 (29) Johansson MW, Kelly EA, Busse WW, Jarjour NN, Mosher DF. Up-regulation and  
12 activation of eosinophil integrins in blood and airway after segmental lung antigen challenge.  
13 *J Immunol* 2008 Jun 1;180(11):7622-7635.  
14
- 15 (30) Kanters D, ten Hove W, Luijk B, van Aalst C, Schweizer RC, Lammers JW, et al.  
16 Expression of activated Fc gamma RII discriminates between multiple granulocyte-priming  
17 phenotypes in peripheral blood of allergic asthmatic subjects. *J Allergy Clin Immunol* 2007  
18 Nov;120(5):1073-1081.  
19
- 20 (31) Pillay J, Hietbrink F, Koenderman L, Leenen LP. The systemic inflammatory response  
21 induced by trauma is reflected by multiple phenotypes of blood neutrophils. *Injury* 2007  
22 Dec;38(12):1365-1372.  
23
- 24 (32) Oudijk EJ, Lo Tam Loi AT, Langereis JD, Ulfman LH, Koenderman L. Functional  
25 antagonism by GM-CSF on TNF-alpha-induced CD83 expression in human neutrophils. *Mol*  
26 *Immunol* 2008 Nov;46(1):91-96.  
27
- 28 (33) Langereis JD, Franciosi L, Ulfman LH, Koenderman L. GM-CSF and TNFalpha  
29 modulate protein expression of human neutrophils visualized by fluorescence two-  
30 dimensional difference gel electrophoresis. *Cytokine* 2011 Nov;56(2):422-429.  
31
- 32 (34) de Jager W, te Velthuis H, Prakken BJ, Kuis W, Rijkers GT. Simultaneous detection of  
33 15 human cytokines in a single sample of stimulated peripheral blood mononuclear cells. *Clin*  
34 *Diagn Lab Immunol* 2003 Jan;10(1):133-139.  
35
- 36 (35) Huijsmans RJ, de Haan A, ten Hacken NN, Straver RV, van't Hul AJ. The clinical utility  
37 of the GOLD classification of COPD disease severity in pulmonary rehabilitation. *Respir Med*  
38 2008 Jan;102(1):162-171.  
39
- 40 (36) O'Neil SE, Lundback B, Lotvall J. Proteomics in asthma and COPD phenotypes and  
41 endotypes for biomarker discovery and improved understanding of disease entities. *J*  
42 *Proteomics* 2011 Dec 10;75(1):192-201.  
43
- 44 (37) Anderson GP. Endotyping asthma: new insights into key pathogenic mechanisms in a  
45 complex, heterogeneous disease. *Lancet* 2008 Sep 20;372(9643):1107-1119.  
46
- 47 (38) Vestbo J, Anderson W, Coxson HO, Crim C, Dawber F, Edwards L, et al. Evaluation of  
48 COPD Longitudinally to Identify Predictive Surrogate End-points (ECLIPSE). *Eur Respir J*  
49 2008 Apr;31(4):869-873.  
50
- 51 (39) Agusti A, Calverley PM, Celli B, Coxson HO, Edwards LD, Lomas DA, et al.  
52 Characterisation of COPD heterogeneity in the ECLIPSE cohort. *Respir Res* 2010 Sep  
53 10;11:122.  
54  
55  
56  
57  
58  
59  
60

- 1  
2  
3 (40) Vestbo J, Edwards LD, Scanlon PD, Yates JC, Agusti A, Bakke P, et al. Changes in  
4 forced expiratory volume in 1 second over time in COPD. *N Engl J Med* 2011 Sep  
5 29;365(13):1184-1192.  
6  
7 (41) Qiu W, Cho MH, Riley JH, Anderson WH, Singh D, Bakke P, et al. Genetics of sputum  
8 gene expression in chronic obstructive pulmonary disease. *PLoS One* 2011;6(9):e24395.  
9  
10 (42) Castaldi PJ, Cho MH, Litonjua AA, Bakke P, Gulsvik A, Lomas DA, et al. The  
11 Association of Genome-Wide Significant Spirometric Loci with Chronic Obstructive  
12 Pulmonary Disease Susceptibility. *Am J Respir Cell Mol Biol* 2011 Dec;45(6):1147-1153.  
13  
14 (43) Lomas DA, Silverman EK, Edwards LD, Locantore NW, Miller BE, Horstman DH, et al.  
15 Serum surfactant protein D is steroid sensitive and associated with exacerbations of COPD.  
16 *Eur Respir J* 2009 Jul;34(1):95-102.  
17  
18 (44) Sin DD, Miller BE, Duvoix A, Man SF, Zhang X, Silverman EK, et al. Serum PARC/CCL-  
19 18 concentrations and health outcomes in chronic obstructive pulmonary disease. *Am J*  
20 *Respir Crit Care Med* 2011 May 1;183(9):1187-1192.  
21  
22 (45) Pillai SG, Kong X, Edwards LD, Cho MH, Anderson WH, Coxson HO, et al. Loci  
23 identified by genome-wide association studies influence different disease-related phenotypes  
24 in chronic obstructive pulmonary disease. *Am J Respir Crit Care Med* 2010 Dec  
25 15;182(12):1498-1505.  
26  
27 (46) Sin DD, Anthonisen NR, Soriano JB, Agusti AG. Mortality in COPD: Role of  
28 comorbidities. *Eur Respir J* 2006 Dec;28(6):1245-1257.  
29  
30 (47) Anthonisen NR, Skeans MA, Wise RA, Manfreda J, Kanner RE, Connett JE, et al. The  
31 effects of a smoking cessation intervention on 14.5-year mortality: a randomized clinical trial.  
32 *Ann Intern Med* 2005 Feb 15;142(4):233-239.  
33  
34  
35  
36  
37  
38  
39  
40  
41  
42  
43  
44  
45  
46  
47  
48  
49  
50  
51  
52  
53  
54  
55  
56  
57  
58  
59  
60

1  
2  
3  
4  
5  
6  
7  
8  
9  
10  
11  
12  
13  
14  
15  
16  
17  
18  
19  
20  
21  
22  
23  
24  
25  
26  
27  
28  
29  
30  
31  
32  
33  
34  
35  
36  
37  
38  
39  
40  
41  
42  
43  
44  
45  
46  
47  
48  
49  
50  
51  
52  
53  
54  
55  
56  
57  
58  
59  
60

**Figure 1 Acute smoking effects in the lung**

**Figure 2 General hypothesis about the role of systemic inflammation**

For peer review only

1  
2  
3  
4  
5  
6  
7  
8  
9  
10  
11  
12  
13  
14  
15  
16  
17  
18  
19  
20  
21  
22  
23  
24  
25  
26  
27  
28  
29  
30  
31  
32  
33  
34  
35  
36  
37  
38  
39  
40  
41  
42  
43  
44  
45  
46  
47  
48  
49  
50  
51  
52  
53  
54  
55  
56  
57  
58  
59  
60

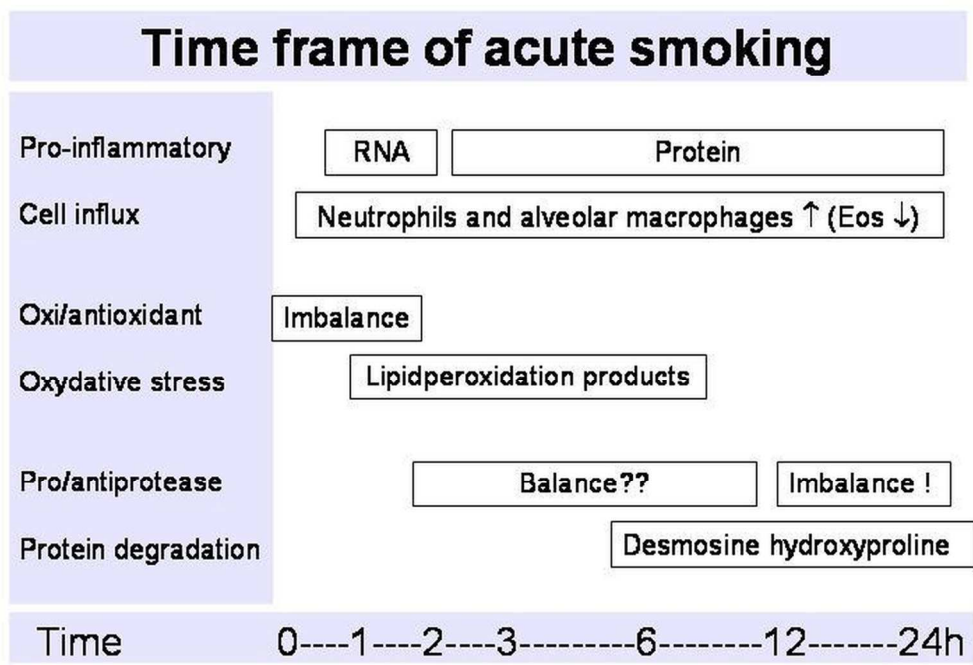

127x90mm (300 x 300 DPI)

view only

1  
2  
3  
4  
5  
6  
7  
8  
9  
10  
11  
12  
13  
14  
15  
16  
17  
18  
19  
20  
21  
22  
23  
24  
25  
26  
27  
28  
29  
30  
31  
32  
33  
34  
35  
36  
37  
38  
39  
40  
41  
42  
43  
44  
45  
46  
47  
48  
49  
50  
51  
52  
53  
54  
55  
56  
57  
58  
59  
60

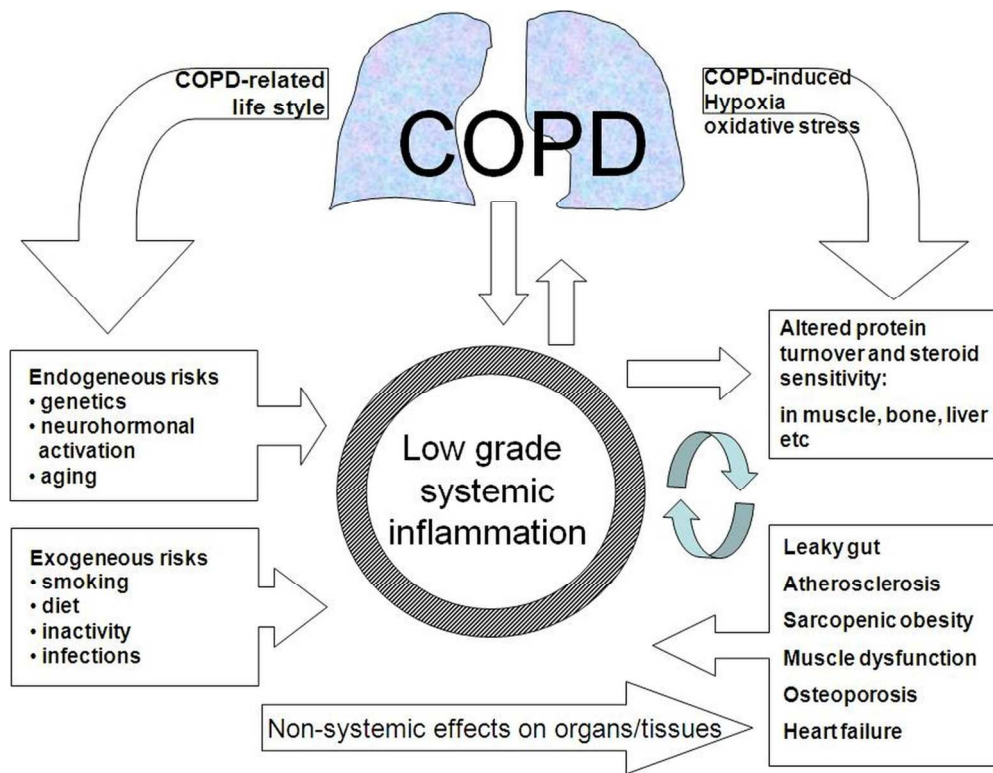

117x90mm (300 x 300 DPI)

Review only

# Please wait...

If this message is not eventually replaced by the proper contents of the document, your PDF viewer may not be able to display this type of document.

You can upgrade to the latest version of Adobe Reader for Windows®, Mac, or Linux® by visiting [http://www.adobe.com/go/reader\\_download](http://www.adobe.com/go/reader_download).

For more assistance with Adobe Reader visit <http://www.adobe.com/go/acrreader>.

Windows is either a registered trademark or a trademark of Microsoft Corporation in the United States and/or other countries. Mac is a trademark of Apple Inc., registered in the United States and other countries. Linux is the registered trademark of Linus Torvalds in the U.S. and other countries.

# Please wait...

If this message is not eventually replaced by the proper contents of the document, your PDF viewer may not be able to display this type of document.

You can upgrade to the latest version of Adobe Reader for Windows®, Mac, or Linux® by visiting [http://www.adobe.com/go/reader\\_download](http://www.adobe.com/go/reader_download).

For more assistance with Adobe Reader visit <http://www.adobe.com/go/acrreader>.

Windows is either a registered trademark or a trademark of Microsoft Corporation in the United States and/or other countries. Mac is a trademark of Apple Inc., registered in the United States and other countries. Linux is the registered trademark of Linus Torvalds in the U.S. and other countries.

# Please wait...

If this message is not eventually replaced by the proper contents of the document, your PDF viewer may not be able to display this type of document.

You can upgrade to the latest version of Adobe Reader for Windows®, Mac, or Linux® by visiting [http://www.adobe.com/go/reader\\_download](http://www.adobe.com/go/reader_download).

For more assistance with Adobe Reader visit <http://www.adobe.com/go/acrreader>.

Windows is either a registered trademark or a trademark of Microsoft Corporation in the United States and/or other countries. Mac is a trademark of Apple Inc., registered in the United States and other countries. Linux is the registered trademark of Linus Torvalds in the U.S. and other countries.



# Please wait...

If this message is not eventually replaced by the proper contents of the document, your PDF viewer may not be able to display this type of document.

You can upgrade to the latest version of Adobe Reader for Windows®, Mac, or Linux® by visiting [http://www.adobe.com/go/reader\\_download](http://www.adobe.com/go/reader_download).

For more assistance with Adobe Reader visit <http://www.adobe.com/go/acrreader>.

Windows is either a registered trademark or a trademark of Microsoft Corporation in the United States and/or other countries. Mac is a trademark of Apple Inc., registered in the United States and other countries. Linux is the registered trademark of Linus Torvalds in the U.S. and other countries.

# Please wait...

If this message is not eventually replaced by the proper contents of the document, your PDF viewer may not be able to display this type of document.

You can upgrade to the latest version of Adobe Reader for Windows®, Mac, or Linux® by visiting [http://www.adobe.com/go/reader\\_download](http://www.adobe.com/go/reader_download).

For more assistance with Adobe Reader visit <http://www.adobe.com/go/acrreader>.

Windows is either a registered trademark or a trademark of Microsoft Corporation in the United States and/or other countries. Mac is a trademark of Apple Inc., registered in the United States and other countries. Linux is the registered trademark of Linus Torvalds in the U.S. and other countries.

# Please wait...

If this message is not eventually replaced by the proper contents of the document, your PDF viewer may not be able to display this type of document.

You can upgrade to the latest version of Adobe Reader for Windows®, Mac, or Linux® by visiting [http://www.adobe.com/go/reader\\_download](http://www.adobe.com/go/reader_download).

For more assistance with Adobe Reader visit <http://www.adobe.com/go/acrreader>.

Windows is either a registered trademark or a trademark of Microsoft Corporation in the United States and/or other countries. Mac is a trademark of Apple Inc., registered in the United States and other countries. Linux is the registered trademark of Linus Torvalds in the U.S. and other countries.

# Please wait...

If this message is not eventually replaced by the proper contents of the document, your PDF viewer may not be able to display this type of document.

You can upgrade to the latest version of Adobe Reader for Windows®, Mac, or Linux® by visiting [http://www.adobe.com/go/reader\\_download](http://www.adobe.com/go/reader_download).

For more assistance with Adobe Reader visit <http://www.adobe.com/go/acrreader>.

Windows is either a registered trademark or a trademark of Microsoft Corporation in the United States and/or other countries. Mac is a trademark of Apple Inc., registered in the United States and other countries. Linux is the registered trademark of Linus Torvalds in the U.S. and other countries.

# Please wait...

If this message is not eventually replaced by the proper contents of the document, your PDF viewer may not be able to display this type of document.

You can upgrade to the latest version of Adobe Reader for Windows®, Mac, or Linux® by visiting [http://www.adobe.com/go/reader\\_download](http://www.adobe.com/go/reader_download).

For more assistance with Adobe Reader visit <http://www.adobe.com/go/acrreader>.

Windows is either a registered trademark or a trademark of Microsoft Corporation in the United States and/or other countries. Mac is a trademark of Apple Inc., registered in the United States and other countries. Linux is the registered trademark of Linus Torvalds in the U.S. and other countries.

# Please wait...

If this message is not eventually replaced by the proper contents of the document, your PDF viewer may not be able to display this type of document.

You can upgrade to the latest version of Adobe Reader for Windows®, Mac, or Linux® by visiting [http://www.adobe.com/go/reader\\_download](http://www.adobe.com/go/reader_download).

For more assistance with Adobe Reader visit <http://www.adobe.com/go/acrreader>.

Windows is either a registered trademark or a trademark of Microsoft Corporation in the United States and/or other countries. Mac is a trademark of Apple Inc., registered in the United States and other countries. Linux is the registered trademark of Linus Torvalds in the U.S. and other countries.

# Please wait...

If this message is not eventually replaced by the proper contents of the document, your PDF viewer may not be able to display this type of document.

You can upgrade to the latest version of Adobe Reader for Windows®, Mac, or Linux® by visiting [http://www.adobe.com/go/reader\\_download](http://www.adobe.com/go/reader_download).

For more assistance with Adobe Reader visit <http://www.adobe.com/go/acrreader>.

Windows is either a registered trademark or a trademark of Microsoft Corporation in the United States and/or other countries. Mac is a trademark of Apple Inc., registered in the United States and other countries. Linux is the registered trademark of Linus Torvalds in the U.S. and other countries.

# Please wait...

If this message is not eventually replaced by the proper contents of the document, your PDF viewer may not be able to display this type of document.

You can upgrade to the latest version of Adobe Reader for Windows®, Mac, or Linux® by visiting [http://www.adobe.com/go/reader\\_download](http://www.adobe.com/go/reader_download).

For more assistance with Adobe Reader visit <http://www.adobe.com/go/acrreader>.

Windows is either a registered trademark or a trademark of Microsoft Corporation in the United States and/or other countries. Mac is a trademark of Apple Inc., registered in the United States and other countries. Linux is the registered trademark of Linus Torvalds in the U.S. and other countries.



# Please wait...

If this message is not eventually replaced by the proper contents of the document, your PDF viewer may not be able to display this type of document.

You can upgrade to the latest version of Adobe Reader for Windows®, Mac, or Linux® by visiting [http://www.adobe.com/go/reader\\_download](http://www.adobe.com/go/reader_download).

For more assistance with Adobe Reader visit <http://www.adobe.com/go/acrreader>.

Windows is either a registered trademark or a trademark of Microsoft Corporation in the United States and/or other countries. Mac is a trademark of Apple Inc., registered in the United States and other countries. Linux is the registered trademark of Linus Torvalds in the U.S. and other countries.

# Please wait...

If this message is not eventually replaced by the proper contents of the document, your PDF viewer may not be able to display this type of document.

You can upgrade to the latest version of Adobe Reader for Windows®, Mac, or Linux® by visiting [http://www.adobe.com/go/reader\\_download](http://www.adobe.com/go/reader_download).

For more assistance with Adobe Reader visit <http://www.adobe.com/go/acrreader>.

Windows is either a registered trademark or a trademark of Microsoft Corporation in the United States and/or other countries. Mac is a trademark of Apple Inc., registered in the United States and other countries. Linux is the registered trademark of Linus Torvalds in the U.S. and other countries.

1  
2  
3 Groningen, The Netherlands, 17 December 2012  
4  
5  
6  
7

8 Dear Editor,  
9

10  
11 Please find attached our revised manuscript entitled **'Acute and chronic inflammatory responses**  
12 **induced by smoking in individuals being susceptible and non-susceptible for development of**  
13 **COPD: from specific disease phenotyping towards novel therapy: a cross-sectional study'**.  
14  
15

16  
17 We would like to thank the reviewers for their excellent and constructive comments to improve this  
18 manuscript. We have modified the text according to the majority of the reviewers' suggestions. Our  
19 reply to all the points raised by the reviewers is indicated in the *'Response to decision letter'*  
20 document.  
21

22  
23 We hope that you find this revised manuscript suitable for publication in *BMJ Open*.  
24

25  
26 Sincerely yours,  
27

28 On behalf of all authors,  
29

30  
31  
32 Nick ten Hacken  
33 Dept. of Pulmonary diseases  
34 University Medical Center Groningen  
35 Hanzeplein 1  
36 9713 GZ Groningen  
37 The Netherlands  
38 phone: +31-50-3614574  
39 Fax: +31-50-3619320  
40 [n.h.t.ten.hacken@umcg.nl](mailto:n.h.t.ten.hacken@umcg.nl)  
41  
42  
43  
44  
45  
46  
47  
48  
49  
50  
51  
52  
53  
54  
55  
56  
57  
58  
59  
60
